# Supplementary material for: An RNA-Binding Complex Involved in Ribosome Biogenesis Contains a Protein with Homology to tRNA CCA-Adding Enzyme
Source: PLoS Biol. 2013 Oct 1;11(10):e1001669. doi: 10.1371/journal.pbio.1001669 (PMC3794860; doi:10.1371/journal.pbio.1001669)
Supplement: Text S2 — Alignment of 115 Rrp7 sequences. The alignment file is in the fasta format. (FASTA) [file pbio.1001669.s013.fasta]

>S_cerevisiae_6319818 gi|6319818|ref|NP_009899.1| Rrp7p [Saccharomyces cerevisiae S288c]
----------------------------------MGIEDISA-----M--KNGF-IVVPFKL--PDHKALPK
SQEA---------SLHFMFAKRHQS----------------SNSNES-------DCLFLVNLPLLSNIEHMK
KFVGQLCGKYDTVSHVEEL---------LYND----------------------------------------
-------EFGLHEVDLSALTS------DLMSSTD-------------VNEKRYTPRNTALLKFVDAASINNC
WNALKK--------------YSNLHAKHPNEL----------------------------------------
--------------------------FEWTYTTPSFTT----------------FVNF-Y---KPLDI-DYL
KEDIHTHMAIFEQ-------REAQAQE------------DVQ----SSIVD-EDGFTLV-V---GKNTKS-L
NSIRKKILNK---NPLSKHENK----AKP--ISNIDKKAK--KD--FYRFQVRERKKQEINQLLSKFKEDQE
RIKVMKAKR-KFN----------PYT--------------------------------------------
>H_sapiens_25092725 gi|25092725|ref|NP_056518.2| ribosomal RNA-processing protein 7 homolog A [Homo sapiens]
------------------------MVARRRKCAARDPEDRIP-----S--PLGY-AAIPIKF--SEKQQ---
-------------ASHYLYVRAHGV----------------RQGTKS--TWPQKRTLFVLNVPPYCTEESLS
RLLS-TC------GLVQSV---------ELQE----------------------------------------
-------KPD--LAESPKESR-----SKFF-HPK-----------------PVPGFQVAYVVFQKPSGVSAA
LAL--K----GP--------LLVSTESHP--V----------------------------------------
--------------------------------KSGIHK----------------WISD-Y-ADSVPDP-EAL
RVEVDTFMEAYDQ-------KIAEEEA------------KAK--EEEGVPD-EEGWVKV-TRR-GRRPVL--
--------PR---TEAASLRVL----ERE--RRKRSRKEL--LN--FYAWQHRESKMEHLAQLRKKFEEDKQ
RIELLRAQR-KFR----------PY---------------------------------------------
>N_castellii_366991139 gi|366991139|ref|XP_003675337.1| hypothetical protein NCAS_0B08830 [Naumovozyma castellii CBS 4309]
-----------------------------MNANDELSKIDCM--------KNGF-LVIPFKL---PEVLKKP
MLKD---------AFHYMFIKKHQT----------------KQESEM-------NSLFVVNIPLLTNLDIMK
TVTAKICERYDTMAHVENL---------LYND----------------------------------------
-------EFGLNEINLSALTS------DLLTDTN------------DQSESRFTPRNTALLKFIDESSLNNC
FNALKK--------------YSQIDRKKK--V----------------------------------------
-----------------------DELLEWEFTSPSMNT----------------FINF-Y---KPIDL-EYL
KNDVYEHLKIFEQ-------RELEEQE------------NVQ----SSIVD-EDGFTLV-V---GKNTKS-L
NSIRKKILNR---NPLSKYENKVS--KQM--PNAIDKKAK--QD--FYRFQVRERKKQEINQLLNKFKEDQE
KIKVMKAKR-KFN----------PYK--------------------------------------------
>K_africana_410078482 gi|410078482|ref|XP_003956822.1| hypothetical protein KAFR_0D00400 [Kazachstania africana CBS 2517]
-----------------------------------MVKVDSM--------KNGF-LVIPFKLPKYKSVEKVL
NKKD---------AYHYMFFRRHES----------------KNEQEK-------NCLFVVNIPLLTNLDTLK
GIMNKICASNDTVSHIEDL---------LFND----------------------------------------
-------EFGLQEIDLSSLTS------DLMADSS-------------LAEKRFTPRNTALLKFLDEPSLNNC
WNSLKR--------------YSKNKPENL--L-------------------------EWAY-----------
-------------------------------TSPSIST----------------FVSF-Y---KPLDI-DYL
KESVYTHLSLFEQ-------REEQAQE------------DIQ----RSLVD-EDGFTLV-V---GKNTKT-L
NSIKKKILNR---NPLSKHESK----KPI--LTTVDKKAK--KD--FYRFQVREHKKQEIDQLLAKFKQDQE
KVKIMKAKR-KFN----------PYKNNL-----------------------------------------
>T_delbrueckii_367012517 gi|367012517|ref|XP_003680759.1| hypothetical protein TDEL_0C06590 [Torulaspora delbrueckii]
--------------------------------MVDKPVAIET-----M--KNGF-LVVPFKL---PQSAVLK
SSHT---------GFHYTFVKKHQS----------------KLETEQ-------NSLFIVNIPLLTHLDNVK
NVFNKICSQSDTVSHIEDL---------MYND----------------------------------------
-------EFGLQEVDLSALTS------DLM-SPE------------KASEVRYTPRNTALLKFLDKASLDNC
WDALRK--------------YTADSRDSL--I-------------------------EWEY-----------
-------------------------------QSPTVAT----------------FINF-Y---KPIDV-EHL
KEDIYTHMKIFQQ-------REQESKE------------AA----QSSIVD-EDGFTLV-V---GHNTKS-L
NSIRKKILNK---NPLSKHENK----QAP--PSAVDKKVK--KD--FYRFQIRERKKLEINQLLTKFKEDQE
QIKVMKAKR-KFN----------PYT--------------------------------------------
>Z_rouxii_254584798 gi|254584798|ref|XP_002497967.1| ZYRO0F17622p [Zygosaccharomyces rouxii]
-------------------------------MVAKGESVHSM--------KNGF-LVVPFRL---PVTRFLP
GDES---------KHHYMFVKKHQS----------------KVQEEQ-------SCLFVVNIPLLTGLETLK
SAFNKIFAQYDTVSHIEDL---------LYHD----------------------------------------
-------EFGLREVDLSRLTS------DLLSTGT-------------PEETRFTPRNTALLKFVDEASVNNC
LSALRK--------------YSQSDKSKS--I-------------------------EWEY-----------
-------------------------------TSPSVSA----------------LLDF-Y----KPLPKDYL
KEDIAEHMSIFEQ-------REQQAQE------------DVQ----SSLVD-EDGFTLV-V---GKNTKS-L
NSIRKKVLNK---NPLSKHESK----VLP--PSAVDKKAK--QD--FYRFQIRERKKREINQLLVKFKEDQE
RIKVMKAKK-KFN----------PYT--------------------------------------------
>C_glabrata_50285161 gi|50285161|ref|XP_445009.1| hypothetical protein [Candida glabrata CBS 138]
--------------------------MSTEKKSAKNVSSIDA-----M--KNGF-IVLPFKL--PEESSLKG
IAER---------SFHYIFARKHQT----------------KLDEEK-------NCLFLVNLPLLANLDSLK
KAFNNILERDNSVAHIEQL---------LHND----------------------------------------
-------EFGLREVDLSPLTS------DLM-SSE------------DSNKERFTPRNTALLKFVDEASLNNC
WSSIKK--------------YSTNSHKKSNYI-------------------------TWEY-----------
-------------------------------SSPSIST----------------FTNF-YKPLSI----DYL
KEDIHSYMSVFEE-------RERQAQG------------DI----QTSIVD-EDGFTLV-V---GKNTKS-L
NSIKKKILNR---NPLSKHENK----VKP--PSAVDKKAK--QD--FYRFQVRERKKQEINELLSKFKEDQA
KIKVMKDKK-KFN----------PYAQ-------------------------------------------
>A_gossypii_302309057 gi|302309057|ref|NP_986253.2| AFR705Wp [Ashbya gossypii ATCC 10895]
-----------------------------------MKNVEVM--------RSGF-LVIPFDL---PKCTALG
DDTD---------VRHYMYVKKHQT----------------KVESEA-------NCLFIVNLPLLTQVDSIK
ESFGRICAQYETVAHVAEL---------LHHD----------------------------------------
-------EFGLHEVDLGALTS------DFR-DTG------------DAEDRRYTPRNSALLKFVDQASLENC
WAALRK--------------YAHKQKELV----------------------------EWAF-----------
-------------------------------QSPSIAT----------------FQSF-Y---KPLDL-EYL
RSDIHEHMLLFEQ-------REQLAQD------------EV----QSSIVD-EDGFTLV-V---GKNTKS-L
NSIRRRILNR---NPLLKHTRK----EKP--PSMVDKKAK--QD--FYRFQLREQKKQEINELLSKFKEDQE
RIKVMKSKR-KFN----------PYS--------------------------------------------
>E_cymbalariae_363747812 gi|363747812|ref|XP_003644124.1| hypothetical protein Ecym_1049 [Eremothecium cymbalariae DBVPG#7215]
-----------------------------------MGHIEMM--------KSGF-FVIPFKL--PKYDVLKS
DKP----------PMHYMFVKKHQN----------------KIQQEA-------NCLFIVNLPLLSNLNSIK
SSFNNICEKFNTVAHITEL---------LYHD----------------------------------------
-------EFGLQDVDLSVLTSDLLDTNDLK-DKR------------------YTPNNTVLLKFLDEASLDNC
WNALRK--------------YSHMPKELV----------------------------QWEY-----------
-------------------------------SIPSVSS----------------FTNF-Y---KHIEI-NWL
KENIHKHMKLFEE-------REQQAQE------------QVQ----STIVD-DDGFTLV-V---GKNTKS-L
NSIRRKILNR---NPLLKHSQK----VIA--PSIVDKKAK--KD--FYRFQVRERKKQEINELLKKFKEDQE
RIKIMKSQR-KFN----------PYA--------------------------------------------
>K_lactis_50304605 gi|50304605|ref|XP_452258.1| hypothetical protein [Kluyveromyces lactis NRRL Y-1140]
-------MRRDELKKFASTTFNEFVWVIHRSRYLSTHFQYERMVLEQM--QNGF-LIVPFLL--PQVKSLNQ
KPTK---------VYHYMFVRKHQS----------------KLENEQ-------HCLFLVNLPLLTQLENLK
KNFQEICHQNETVSHVQDL---------LYHD----------------------------------------
-------EFGLHDVDLSSLTS------HLM-SVD------------EPSEKRFTPRNTALLQFVDKQSVENC
WEALRK--------------YSSSKKQQQ--I-------------------------LWEF-----------
-------------------------------QSPSIET----------------FTAF-Y----RPLPLKYL
KTDIHEHMALFEQ-------REQQAQE------------EVQ----SSIVD-EDGFTLV-V---GKNTKS-L
NSIRKKIFNR---NPLLKHEKP----KKM--PNMVDKKAK--KD--FYRFQVRERKKQEINELLAKFKQDQE
KIKEMKSKR-RFN----------PYT--------------------------------------------
>L_thermotolerans_255715978 gi|255715978|ref|XP_002554270.1| KLTH0F01386p [Lachancea thermotolerans]
---------------MKRRVNWSTRSLNNARYTEPQPTYKMSARVDSM--KNGF-LVIPFKL--PQSQKLEE
HSEE---------ACHYMFIKKHQS----------------KSELEQ-------NCLFLVNLPLLTHLENLK
QGFGSIMSQYGSVAHVAQL---------LHHD----------------------------------------
-------EFGLSEVDLSSLTS------DLMSTGD-------------AEEKRYTPRNTALLQFVDAASVDNA
WSALRK--------------YSQERKQSK--I----------------------------------------
--------------------------VTWNFDSPSMAT----------------FINF-Y---KPLDL-DYL
KEDVYSHMALFEQ-------REQQAQE------------QAQ----SSIVD-EDGFTLV-V---GKNTKN-L
NSIRKKILNK---NPLLKHEKI----VKP--PTMVDKKAK--QD--FYRFQIRERKKQEISELLKKFKQDQE
KIKEMKSKR-KFN----------PYA--------------------------------------------
>N_dairenensis_365981223 gi|365981223|ref|XP_003667445.1| hypothetical protein NDAI_0A00440 [Naumovozyma dairenensis CBS 421]
-------------------MAESSEVKQRQELKTKSSSSSLATGIDCM--KNGF-LVIPFKL----------
-SPN---------VYHYTFVKKHQT----------------KLDSES-------NGLFVVNLPLLTNVDILK
KVLSQICSKFDTIAHVEKL---------LYND----------------------------------------
-------EFGLDEIDLSSLTS------DLLKDTN------------NTNESRFTPRNTSVLKFVDESSLNNC
FNALRK----YSQLTSSSSKKNKNVDDEL--I-------------------------QWEF-----------
-------------------------------ENPSIAT----------------FINF-Y---KPIDI-EYL
KNDVYEHLKIFEQ-------RELEEES------------NV----QSSIVD-EDGFTLV-V---GKNTKS-L
NSIRKKILNR---NPLSKYESKVGGDKRT--PNAIDKKAK--QD--FYRFQVRERKKQEINQLLNKFKEDQE
KIKVMKAKR-KFN----------PYK--------------------------------------------
>T_phaffii_367002319 gi|367002319|ref|XP_003685894.1| hypothetical protein TPHA_0E03710 [Tetrapisispora phaffii CBS 4417]
------------------------------MSESAKFHYVKT-----M--KSGF-LVVPFKL--PKHRALKK
DA-GLNNN-----SFHYVYIKKHVN----------------KDNEEE------KNCLFAINLPILSNTEFIK
KVFNDIC----SKNDTIA----------YIEK---LLQYD--------------------------------
-------EFGLEEIDLSSLTS------DLM-SNKS----SEDE-QAKMNENRYTPRNTCLIKFVDESSLENC
YSSIKK----YC-----DLIQKKKEKANF--I-------------------------EW-------------
-------------------------EYV---SP-SITT----------------FINF-Y-KP--IDI-DYL
KEDISLHMKIFEE-------RENTARE------------EA----QSSIVD-EDGFTLV-V---GKNTKS-L
NSIKKKILNK---NPLLKHKTK---AKQG--NSMVDKKVK--QD--FYRFQVRERKKQEINELLSKFKDDQE
RIKVMKAKK-KFN----------PYNNSL-----------------------------------------
>V_polyspora_156847886 gi|156847886|ref|XP_001646826.1| hypothetical protein Kpol_2002p38 [Vanderwaltozyma polyspora DSM 70294]
-----------------------------MPDKNSDPVKVES-----M--KNGF-LVMPFKL--PTHKAFEK
NNKDINSN-----GYHYTFLKKHES----------------K-NEDE------QNSVFVVNLPILANIESVK
KVVNEIC----TRYDTVS----------YVEE---LLYND--------------------------------
-------EFGLQEIDLSKLTS------DLM--STG-----------SKEESRFTPRNTLLIKFVDDSSCKNF
ISALKK----YT-------KEVNEKDDKY--I-------------------------EW-------------
-------------------------EYT---IP-SVAT----------------FTNF-Y-KP--LDT-EYL
KEDISNHMELFEV-------REMQAKE------------DI----QSSIVD-EDGFTLV-V---GKNTKN-L
NSIRKKILNK---NPLLKHGTK----IKG--PSMVDKKIK--ED--FYRFQVRERKKQEINQLLSKFKEDQE
KIKEMKMKK-KFN----------PYK--------------------------------------------
>C_albicans_68481472 gi|68481472|ref|XP_715375.1| likely small subunit rRNA processing protein [Candida albicans SC5314]
-------------------------------------MAPTE-----I--K-GF-YVLPLKL--TG------
---T---K-----SIHYIYFKKHES----------------KGTAND------NRSLFICNLPISTDLSTIK
KFFQKVA----IGSTIES----------FINS---LLTDY--------------------------------
-------PEDIW-INLTKLTS------DLD-L---------VD-AVD-EQASKLPKNCGIVAFIDKASFTLA
FNSLKK----LS------------SSLTE--C-------------------------EW-------------
-------------------------PIQ---QF-TSNY----------------YLKQ-Y-QKQILDP-NSL
TEEVSQALIDFDK-------AEQQSIE------------ELQ--SQRNLVD-EDGFTLV-V---GSHRKT--
---KAGILGK---QKLASTVGV----VKA--QSKMKSKEK--QD--FYRFQLRQRKKEEMNELLNKFKLDQE
KVRMMKEKK-RFR----------PY---------------------------------------------
>C_dubliniensis_241951042 gi|241951042|ref|XP_002418243.1| ribosomal rna-processing protein, putative [Candida dubliniensis CD36]
-------------------------------------MSPTE-----I--K-GF-YVLPLKL--TG------
---T---K-----SIHYIYFKKHES----------------KSSSND------NRSLFICNLPISTDLSTIK
KFFQKIA----IGSTIES----------FINS---LLTDY--------------------------------
-------PEDIW-INLTKLTS------DLD-L---------AD-VVD-EQASKLPKNCGIVTFIDKASFTLA
FNSLKK----LS------------SSLTE--C-------------------------EW-------------
-------------------------PIQ---QF-TSNY----------------YLNK-Y-QKQILDP-KSL
TEEVSQALTDFDK-------AEQQSIE------------ELQ--SQRNLVD-EDGFTLV-V---GSHRKT--
---KAGILGK---QKLASTVGV----VKA--QSKMKSKEK--QD--FYRFQLRQRKKEEMNELLNKFKLDQE
KVRMMKEKK-RFR----------PY---------------------------------------------
>C_tropicalis_255724218 gi|255724218|ref|XP_002547038.1| conserved hypothetical protein [Candida tropicalis MYA-3404]
------------------------------------MGKTKE-----I--K-GF-NILPLRL--PN------
---T---K-----STHYIYFKKHEV----------------KNSDAN------NRSLFICNLPISTELATIK
KFFQTVA----IGSTIEL----------FINS---YLTDY--------------------------------
-------PEDIW-INLTKLTS------DLD-L---------SN-IAD-DPASKLPKNCGVVTFVDKSSFQLA
FNALKK----LS------------SNGSE--T-------------------------EW-------------
-------------------------PIR---QF-SSNY----------------YLNK-F-QQQILDP-SAL
SEKVSQALIDFDK-------AEQKSIE------------ELQ--EQKTLVD-EDGFTLV-V---GPQRKT--
---KAGILGK---QKLAATVES----EKA--KSKMKSKEK--QD--FYRFQIRQRKKEEMNDLLNKFKMDQE
KVRVMREKK-RFR----------PY---------------------------------------------
>D_hansenii_50426237 gi|50426237|ref|XP_461715.1| DEHA2G03894p [Debaryomyces hansenii CBS767]
-------------------------------------MAVTE-----I--K-GF-LVLPVKL--PE------
---A---S-----RPHYIFFKKHDS----------------KNSTNNSENNNANRSIFFFNLPINTSTASLR
KYFQAVA----IGSTIES----------YTPS---LLTDY--------------------------------
-------AEDIW-VDLTKLTS------DLE-L---------HQ-QEDIEARSKLPKNCGIATFVDKAALVLA
FNALKK----LA------------SSSTE--S-------------------------DW-------------
-------------------------PINASSTF-GSSY----------------FLSK-Y-QSQILDP-EEI
SNIVSQALVDFDK-------AEKESME------------NLQ--QQTQLVD-EDGFTLV-V---GSHRKT--
---KAGIMGR---QKLAATVEV----DKA--KSTMKKKEK--ED--FYRFQLRQRKKDEMNDLLKKFKLDQE
KVRLMKEKK-RFR----------PY---------------------------------------------
>S_stipitis_150863762 gi|150863762|ref|XP_001382342.2| Ribosomal RNA processing protein 7 [Scheffersomyces stipitis CBS 6054]
------------------------------------MVLATE-----I--K-GY-NVLPVSL--PK------
---A---Q-----TTHYIYFKKHET----------------RSTDNQKNSS--GRSIFLCNLPIGTTTSTLK
KFFQEVA----IGATIET----------FVAS---LLNDC--------------------------------
-------PEDVW-INLTKLTS------DLE-FNPD----LQSA-RNTNDEAARLPKNCGVVTFVDKSAFQLA
YTAIRK----LS------------AARTV--S-------------------------SW-------------
-------------------------PFS---TY-DSKY----------------FLNH-Y-KSQILDA-EAL
SDAVSQALVDFDR-------AEQESRD------------NLQ--QQTQLVD-EDGFTLV-V---GSHRKT--
---KAGIMGK---QKLAATVEL----DKA--NTKLKKKEK--ED--FYRFQLRQRKKDEMNELLQKFKLDQE
KVRLMREKK-RFR----------PY---------------------------------------------
>C_lusitaniae_260942697 gi|260942697|ref|XP_002615647.1| hypothetical protein CLUG_04529 [Clavispora lusitaniae ATCC 42720]
-------------------------------------MTITE-----I--K-GF-QILPVRL--PE------
---S---N-----GTHYIYFRKHET----------------KGNQSAASQYISGRSMFIFNLPIETSIATLK
KYFQQVA----IGATIEN----------YYPS---MATDT--------------------------------
-------QEDVY-IDLTRLTS------DLD-Y--------QQD-GFILDITSKLPKNCGILSFIDKASFQLA
FNSLKK----LS------------NDSKS--T-------------------------NW-------------
-------------------------PMP---VL-GSKF----------------LLSK-Y-EQQVCEP-TKL
AEEVSKALADFNR-------AEQESRE------------ELK--RQTEIVD-EDGFTLV-V---GSHRKT--
---KAGIMGK---QKYAATVGA----EKA--KSKIKKKEK--ED--FYRFQLREKKKAEMNDLLKKFKQDQE
RVRMMKEKK-RFR----------PY---------------------------------------------
>M_guilliermondii_146418613 gi|146418613|ref|XP_001485272.1| hypothetical protein PGUG_03001 [Meyerozyma guilliermondii ATCC 6260]
--------------------------------------MVLE-----I--K-GF-HVLPVQF--GG------
---TINKQ-----KPHYLYFKKHEG----------------SQSD--------GRSLFLFNLPIETNFNVLK
KFFQTVA----LGATVEA----------YISS---KLTDS--------------------------------
-------LEDVW-LDMTQLTS------GIE-I---------SV-SEDDELRAKLPRNCGIIRFVDKLAFSLA
FSELKK----RC------------SSQEK--I-------------------------TW-------------
-------------------------PLE--EPM-GSQF----------------LLNK-Y-RSRFLDP-QEL
SDSVSQALVQFDE-------AERESME------------QLQ--QQALLVD-EDGFTMV-V---GSHRKT--
---KAGIMGR---QKLASTVEV----DKA--LAKLKKKEK--ED--FYRFQLREKKKQEMNDLLSKFKQDQE
RVRLMREKK-RFR----------PY---------------------------------------------
>L_elongisporus_149248360 gi|149248360|ref|XP_001528567.1| conserved hypothetical protein [Lodderomyces elongisporus NRRL YB-4239]
-------------------------------------MGKFE-----I--K-GF-SILPVKL--PD------
---S---K-----STQYIFFKKHDA----------------KNDPLNTN----ERSLFLSNLPISCDFTTIK
KFFQEVA----LGSTVES----------FTTS---SLTNC--------------------------------
-------SEDVW-INLTKLTS------DLP-L---------ST-VD--ETATKLPKNSAIVTFVDKASLQLA
YTALKK----LS------------SSSSS--SSSSSSAAATTTTTTTTTTSKQSEIKQW-------------
-------------------------PIK---PM-GSAY----------------YLHA-Y-ELQVLDK-ETL
SEQVAKALQDFDR-------AEKESIE------------ELQ--QQANMVD-EDGFTLV-V---GSHRKT--
---KAGILGK---QKLANTVES----EKA--KNSLKKKEK--QD--FYRFQLREKKKEEMNDLLSKFKADQE
KVRLMREKK-RFR----------PY---------------------------------------------
>K_pastoris_254565791 gi|254565791|ref|XP_002490006.1| Essential protein involved in rRNA processing and ribosome biogenesis [Komagataella pastoris GS115]
-------------MFTLLDINIFSLISLTPTLYQVHTMELAS-----VQEIKGF-VVLPVLFHAPSGK----
-VPK---------AAHYIYIKKHSS----------------KDEGLS------SRSLFIVNIPLGSGLATLK
QFFGKHA----TGAIIE-----------SFVE----------------------------------------
-------CKKDSSINLAKLTS------DLV-THK-------------QSPFPHLPNHCSLITFIDQDACDLA
YQCIKK---------------LVKSSRCP--V----------------------------------------
--------------------------WTLADPL-GSAR----------------YRKL-A-QSHILDI-AQL
NRSIFQDMSEFNR-------REETSYE------------ELS--KLGSTVD-EDGFITV-V---GPHKKT--
---RDEILGR---VKTNNSEIL----AQA--QEKMKKKEK--QD--FYKFQIREKKKLEMNDLLKKFKDDQE
KIKVMKERK-RFR----------PY---------------------------------------------
>A_carolinensis_327287216 gi|327287216|ref|XP_003228325.1| PREDICTED: ribosomal RNA-processing protein 7 homolog A-like [Anolis carolinensis]
--------------------------MATPGKRPERSGSPAA--------PLGF-AVIPVKF----------
-SEK--HQ-----SPHFLYVKEHKV----------------REDKDH--NRPQNNTLFVLNVPPYCTEECLS
RLFSGF-------GSVQSV---------ELCE----------------------------------------
-------KPMLGEKKKPPKTK-------FF-GAT-----------------KPLGFQVAYVVFKSPAGVQAA
KSVSTD----EP--------LVISSNKHP--V----------------------------------------
-------------------------------QT-GIQK----------------WIAN-Y-AALIVNP-VEL
KTEVDAFMQAYDQ-------KIAKEEA------------KAE--KEDGVPD-EEGWVKV-TRK-GRRPGL--
--------PR---TEAANLRAL----ERE--KRKRARKEL--LN--FYAWQHHETKREHIAQLRKKFEEDKQ
KIALMRAQR-KFR----------PY---------------------------------------------
>X_(Silurana)_301610453 gi|301610453|ref|XP_002934763.1| PREDICTED: ribosomal RNA-processing protein 7 homolog A [Xenopus (Silurana) tropicalis]
------------------------------MAPARQCSTLAA--------PAGY-TAVPVKF----------
-SEE--RR-----THHYLYVKEHKV----------------REELDQ--TRPQNRTLFVLNVPPYCTKESLF
QIFTSC-------SPVELV---------ELQD----------------------------------------
-------KPGPSEPQSNTVSQ-------HF-GRR-----------------QLKGFKVAYVVFKHPSGVQAF
KSLKVK----KP--------IVLSEVSHS--I----------------------------------------
-------------------------------KT-GINK----------------WVDD-Y-RASLTGT-AEL
QAEVDEFMKGYDE-------RVAEEEE------------KAN--EEEGVPD-EEGWVKV-TRK-GRRPGL--
--------AR---TEAVNIRVT----ERE--KRKRAQKEL--LN--FYAWQHRESKREHLAELRKKFEEDKQ
KIALMRAQR-KFR----------PF---------------------------------------------
>X_laevis_148237536 gi|148237536|ref|NP_001088724.1| ribosomal RNA processing 7 homolog A [Xenopus laevis]
------------------------------MAPAKEGSTLAA--------PAGY-TAVPVKF----------
-SEE--RR-----THHYLYIKEHKV----------------REDLDQ--TRPQNRTLFVLNVPPYCTKESLS
QIFTSC-------SPVESV---------ELQD----------------------------------------
-------KPGPSETQSNSVSK-------HF-SLR-----------------HLKGFKVAYVVFKHPSGVQAF
KSFKVK----KP--------IVLSGIGHS--I----------------------------------------
-------------------------------KT-GINK----------------WIDN-Y-RASLTDV-AEL
QAEVDEFMKGYDE-------RVAEEEE------------KAK--EEEGVPD-EEGWVKV-TRK-GRRPGL--
--------AR---TEAVNIRVT----ERE--KRKRAQKEL--LN--FYAWQHRESKREHLAELRKKFEEDKQ
KIALMRAQR-KFR----------PY---------------------------------------------
>A_melanoleuca_301782631 gi|301782631|ref|XP_002926727.1| PREDICTED: ribosomal RNA-processing protein 7 homolog A-like [Ailuropoda melanoleuca]
------------------------MVARRGKRGARDSEPGIP-----S--PPGY-SAIPIKF----------
-SEK--QQ-----ASHYLYVREHRV----------------REGTKS--SWPQKRTLFVLNVPPYCTEECLS
RLFS-PC------GSIQSV---------ELQE----------------------------------------
-------KPD--LGDSPKEPK-----SKYF-HPT-----------------PVPGFQVAYVVFQKPGGVSAA
LVL--K----GP--------LLVSTESHP--V----------------------------------------
-------------------------------KS-GICK----------------WISN-Y-ADSVPDP-EAL
RVEVDTFMEAYDK-------RIAEEEA------------QAE--EEEGVPD-EEGWVKV-TRR-GRRPVL--
--------PR---TEAASLRVL----EKE--RRKRARKEL--LN--FYAWQHRETKMEHLAQLRKKFEEDKQ
RIELMRAQR-KFR----------PY---------------------------------------------
>C_lupus_345776782 gi|345776782|ref|XP_851944.2| PREDICTED: ribosomal RNA-processing protein 7 homolog A [Canis lupus familiaris]
------------------------MAARRRKRGARDSEPGIP-----S--PPGY-SAIPIKF----------
-SEK--QQ-----ASHYLYVREHKV----------------REGTKS--SWPQKRTLFVLNVPPYCTEECLS
RLFS-PC------GAVQSV---------ELQE----------------------------------------
-------KPD--LGDSPKEPK-----SKFF-DPT-----------------PVPGFQVAYVVFQKPAGVSAA
IVL--K----GP--------LVVSTESHP--V----------------------------------------
-------------------------------KS-GIHK----------------WISN-Y-VDSVLDP-ETL
RVEVDTFMEAYDK-------RIAEEEA------------KAK--EEEGVPD-EEGWVKV-TRR-GRRPVL--
--------PR---TEAASLRVL----EKE--RQKRARKEL--LN--FYAWQHRETKMEHLAQLRKKFEEDKQ
RIELMRAQR-KFR----------PY---------------------------------------------
>F_catus_410965745 gi|410965745|ref|XP_003989402.1| PREDICTED: ribosomal RNA-processing protein 7 homolog A [Felis catus]
------------------------MVARRRKRGAQGSEQGIP-----S--PPGY-SAIPIKF----------
-SEK--QQ-----ASHYLYVREHRV----------------REGTKS--SWPQKRTLFVLNVPPYCTEECLA
RLLS-PC------GPVQSV---------ELQE----------------------------------------
-------KPD--LADRSEEPK-----SKFF-HPT-----------------PVRGFQVAYVVFQKPGGVSAA
LAL--K----GP--------LLVSTDSHP--V----------------------------------------
-------------------------------KS-GVHK----------------WVSN-Y-TDSVPDP-EAL
RVEVDTFMEAYDK-------RIAEEEA------------KAK--EEEGIPD-EEGWVKV-TRR-GRRPVL--
--------PR---TEAASLRVL----ERE--RRKRARKEL--LN--FYAWQHREAKMEHLAQLRKKFEEDRQ
RIELMRAQR-KFR----------PY---------------------------------------------
>E_caballus_149743378 gi|149743378|ref|XP_001503080.1| PREDICTED: ribosomal RNA-processing protein 7 homolog A-like [Equus caballus]
------------------------MVARRGRRSARGSDEGIP-----S--PPGY-SAIPVKF----------
-SGK--QQ-----ASHYLYVREHRV----------------REGTKS--SWPQKRTLFVLNVPPYCTEECLS
RLLS-PC------GPVRSV---------ELQE----------------------------------------
-------KPD--LAESPKEPQ-----SKFF-QPK-----------------PIPGFQVAYVVFQKPGGVSAA
LAL--K----GP--------LLVSTESHP--V----------------------------------------
-------------------------------KS-GVHK----------------WISD-Y-RDSVLDP-EAL
RAEVDTFMEAYDK-------KVAEEEA------------KAQ--EEEGVPD-EEGWVKV-TRR-GRRPVL--
--------PR---TEAASLRVL----ERE--RRKRARKEL--LN--FYAWQHRETKMEHLAQLRKKFEEDKQ
RIELMRAQR-KFR----------PY---------------------------------------------
>C_porcellus_348569622 gi|348569622|ref|XP_003470597.1| PREDICTED: ribosomal RNA-processing protein 7 homolog A-like [Cavia porcellus]
------------------------MVARGKKRAARDRETRIP-----S--PPGY-SAIPIKF----------
-SEK--QQ-----ASHYLYAREHRV----------------REGAQS--SWPQKRTLFVLNVPPYCSEECLS
RLLS-PC------GPIQSV---------ELQE----------------------------------------
-------KPD--LSESKKEPK-----SRFF-HPK-----------------PIPGFRVAYVVFQRARGVAAA
LTL--K----GP--------LLVSTESHP--V----------------------------------------
-------------------------------KS-GIHK----------------WISD-Y-ADAVADP-EAL
RVEVDTFMEAYDK-------KIAEEEA------------KAK--EEEGVPD-EEGWVKV-TRR-GRRPVL--
--------PR---TEAASLRVL----ERE--RRKRARKEL--LN--FYAWQHRESKMEHLAQLRKKFEEDKQ
RIELLRAQR-KFR----------PY---------------------------------------------
>L_africana_344296152 gi|344296152|ref|XP_003419773.1| PREDICTED: ribosomal RNA-processing protein 7 homolog A-like [Loxodonta africana]
------------------------MVARKRKRAAREAGESLP-----S--PPGY-SAIPIKF----------
-SEK--QQ-----ASHYLYVREHRV----------------REGTKS--AWPQQRTLFVLNVPPYCTEECLS
RLLS-PC------GSIQSV---------ELQE----------------------------------------
-------KPD--LAESPKEPT-----SKFF-HPK-----------------PVPGFQVAHVVFRKPGAVSAA
LAL--R----GP--------LLVSTESHP--V----------------------------------------
-------------------------------KT-GVQK----------------WISE-Y-ADSVLDP-EAL
RVEVDTFMEAYDK-------KIAEEEA------------KAK--EEEGVPD-EEGWVKV-TRR-GRRSVL--
--------PR---TEAASLRVL----ERE--KRKRARKEL--LN--FYAWQPRESKMEHLAQLRRKFEEDKQ
RIELMRAQR-KFR----------PY---------------------------------------------
>C_jacchus_296191966 gi|296191966|ref|XP_002743861.1| PREDICTED: ribosomal RNA-processing protein 7 homolog A [Callithrix jacchus]
------------------------MVARRRKRAARDSENRIP-----S--PSGY-TAIPIKF----------
-SEK--QQ-----ASHYLYVRAHSV----------------REGTKS--TWPRKRTLFVLNVPPYCTEECLS
CLLS-SC------GPVQSM---------ELQD----------------------------------------
-------KPD--LAESLKEPR-----SKFF-HPK-----------------PVPGFQVAYVVFQKPGGVSAA
LAL--K----GP--------LLVSTESHP--V----------------------------------------
-------------------------------KT-GIQK----------------WIRD-Y-ADSVPDP-EAL
RVEVDTFMEAYDQ-------KIAEEET------------KAK--EEEGVPD-EEGWVKV-TRR-GRRPVL--
--------PR---TEAASLRVL----ERE--RRKRARKEL--LN--FYAWQHRESKMEHLAQLRKKFEEDKQ
RIELLRAQR-KFR----------PY---------------------------------------------
>S_boliviensis_403282850 gi|403282850|ref|XP_003932851.1| PREDICTED: ribosomal RNA-processing protein 7 homolog A [Saimiri boliviensis boliviensis]
------------------------MVARRRKRAARDSEDRIP-----S--PPGY-AAIPIKF----------
-SEK--QQ-----ASHYLYVRAHSV----------------REGTRS--TWPQKRTLFVLNVPPYCTEECLS
RLLS-SC------GPVQSV---------QLQE----------------------------------------
-------NPD--PAESPKEPG-----SKFF-HPQ-----------------PVPGFQVAYVVFQKPHGVSAA
LAL--K----GP--------LLVSTESHP--V----------------------------------------
-------------------------------KS-GIHK----------------WIRD-Y-ADSLPDP-EAL
RVEVDTFMEAYDQ-------KITEEEA------------KAK--EEEGVPD-EEGWVKV-TRR-GRRPVL--
--------PR---TEAASLRVL----ERE--RQKRARKEL--LN--FYAWQHRESKMEHLAQLRKKFEEDKQ
RIELLRAQR-KFR----------PY---------------------------------------------
>M_mulatta_302564425 gi|302564425|ref|NP_001181302.1| ribosomal RNA-processing protein 7 homolog A [Macaca mulatta]
------------------------MVARRRKRAARDPEDCIP-----S--PPGY-AAIPIKF----------
-SEK--QQ-----ASHYLYVRAHGV----------------RQGTKS--TWPQKRTLFVLNVPPYCTEESLS
RLLS-SC------GLVQSV---------ELQE----------------------------------------
-------KPD--LAESPKESR-----SKFF-HPK-----------------PVPGFQVAYVVFQKPSGVSAA
LAL--K----GP--------LLVSTESHP--V----------------------------------------
-------------------------------KS-GIHK----------------WISD-Y-ADSVPDP-EAL
RVEVDTFMEAYDQ-------KIAEEEA------------KAK--EEEGVPD-EEGWVKV-TRR-GRRPVL--
--------PR---TEAASLRVL----ERE--RRKRARKEL--LN--FYAWQHRESKMEHLAQLRKKFEEDKQ
RIELLRAQR-KFR----------PY---------------------------------------------
>P_anubis_402911999 gi|402911999|ref|XP_003918583.1| PREDICTED: ribosomal RNA-processing protein 7 homolog A-like [Papio anubis]
------------------------MVARRRKRAARDPEDCIP-----S--PPGY-AAIPIKF----------
-SEK--QQ-----ASHYLYVRAHDV----------------RQGTKS--TWPQKRTLFVLNVPPYCTEESLS
RLLS-SC------GLVQSV---------ELQE----------------------------------------
-------KPD--LAESPKESR-----SKFF-HPK-----------------PVPGFQVAYVVFQKPSGVSAA
LAL--K----GP--------LLVSTESHP--V----------------------------------------
-------------------------------KS-GIHK----------------WISD-Y-ADSMPDP-EAL
RVEVDTFMEAYDQ-------KIAEEEA------------KAK--EEEGVPD-KEGWVKV-TRR-GRRPVL--
--------PR---TEAASLRVL----ERE--RRKRARKEL--LN--FYAWQHRESKMEHLAQLRKKFEEDKQ
RIELLRAQR-KFR----------PY---------------------------------------------
>N_leucogenys_332231402 gi|332231402|ref|XP_003264885.1| PREDICTED: ribosomal RNA-processing protein 7 homolog A-like isoform 2 [Nomascus leucogenys]
------------------------MVARRRKRAARHPEDCIP-----S--PLGY-AAIPIKF----------
-SEK--QQ-----ASHYLYVRAHDA----------------RQGTKS--TWPQKRTLFVLNVPPYCTEESLS
RLLS-SC------GLVQSV---------ELQE----------------------------------------
-------KPD--LAESPKESR-----SKFF-HPK-----------------PVPGFQVAYVVFQKPSGVSAA
LAL--K----GP--------LLVSTESHP--V----------------------------------------
-------------------------------KS-GIHK----------------WISD-Y-ADSVPDP-EAL
RVEVDTFMEAYDQ-------KIAEEEA------------KAK--EEEGVPD-EEGWVKV-TRR-GRRPVL--
--------PR---TEAASLRVL----ERE--RRKRTRKEL--LN--FYAWQHRESKMEHLAQLRKKFEEDKQ
RIELLRAQR-KFR----------PY---------------------------------------------
>P_abelii_197097360 gi|197097360|ref|NP_001125823.1| ribosomal RNA-processing protein 7 homolog A [Pongo abelii]
------------------------MVARRRKRAARDPEDRIP-----S--PLGY-AAIPIKF----------
-SEK--QQ-----ASHYLYVRAHSV----------------RQGTKS--TWPQKRTLFVLNVPPYCTEESLS
RLLS-SC------GPLQSV---------ELQE----------------------------------------
-------KPD--LADSPKESR-----SKFF-HPK-----------------PVPGFRVGYVVFQKPSGVSAA
LAL--Q----GP--------LLVSTESHP--V----------------------------------------
-------------------------------KT-GIHK----------------WISD-Y-ADSVPDP-EAL
RVEVDTFMEAYDQ-------KIAEEEA------------KAK--EEEGVPD-EEGWVKV-TRR-GRRPVL--
--------PR---TEAASLRVL----ERE--RRKRTRKEL--LN--FYAWQHRESKMEHLAQLRKKFEEDKQ
RIELLRAQR-KFR----------PY---------------------------------------------
>N_leucogenys_332231400 gi|332231400|ref|XP_003264884.1| PREDICTED: ribosomal RNA-processing protein 7 homolog A-like isoform 1 [Nomascus leucogenys]
------------------------MAARTRKLAARDPEDRTP-----S--PPCY-AAIPIKF----------
-SEK--QQ-----ASHYLYVRAHGV----------------RQGTKS--TWSQKRTLFVLNVPPYCTEESLS
RLLS-SC------GLVQSV---------ELQE----------------------------------------
-------KPD--LAESPKESR-----SKFF-HPK-----------------PVPGFQVAYVVFQKPSGVSAA
LAL--K----GP--------LLVSTESHP--V----------------------------------------
-------------------------------KS-GIHK----------------WISD-Y-ADSVPDP-EAL
RVEVDTFMEAYDQ-------KIAEEEA------------KAK--EEEGVPD-EEGWVKV-TRR-GRRPVL--
--------PR---TEAASLRVL----ERE--RRKRTRKEL--LN--FYAWQHRESKMEHLAQLRKKFEEDKQ
RIELLRAQR-KFR----------PY---------------------------------------------
>P_anubis_402884442 gi|402884442|ref|XP_003919701.1| PREDICTED: ribosomal RNA-processing protein 7 homolog A [Papio anubis]
------------------------MVARRRKRPARERDDRIP-----S--PPGY-AAIPIKF----------
-SEK--QQ-----ASHYLYVRALGI----------------XQGTKS--TWPQKRTLFVLNVPPYCTEESLS
RLLS-SC------SLVQSV---------ELQE----------------------------------------
-------KPD--LAESPKESR-----SKFF-HPK-----------------PVPGFQVAYVVFQKPSGVSAA
LAL--K----GP--------LLVSTESHP--V----------------------------------------
-------------------------------KS-GIHK----------------WISD-Y-ADSMPDP-EAL
RVEVDTFMEAHDQ-------KIAEEEA------------EAK--EEDGVCD-EEGXVMV-TRW-GRRPVL--
--------PR---TEAASLRVL----ERE--RRKRARKEL--LN--FYAWQHRESKMEHLAQLRKKFEEDKQ
RIELLRAQR-KFR----------PY---------------------------------------------
>O_garnettii_395819638 gi|395819638|ref|XP_003783189.1| PREDICTED: ribosomal RNA-processing protein 7 homolog A [Otolemur garnettii]
------------------------MVARKRKRAGRNSEEGIP-----S--PPGY-SAIPIKF----------
-SEK--QQ-----ASHYLYVRAHSV----------------REGAKS--NWPQKRTLFILNVPPYCTEESLL
RLLS-PC------GPVQSV---------ELQE----------------------------------------
-------KPD--LTENPKEPK-----SKYF-HPK-----------------PVQGFQVAYVVFQKPSGVSAA
LTL--K----GP--------LLVSTESHP--V----------------------------------------
-------------------------------KS-GIHK----------------WISD-Y-TDSIPDP-EAL
RVEVDTFMEAYDQ-------KIAEEEA------------KAK--EEEGVPD-EEGWVKV-TRR-GRRPGL--
--------PR---TEAASLRVL----ERE--RQKRARKEL--LN--FYAWQHRESKMEHLAQLRKKFEEDKQ
RIELMRAQR-KFR----------PY---------------------------------------------
>C_griseus_354493432 gi|354493432|ref|XP_003508846.1| PREDICTED: ribosomal RNA-processing protein 7 homolog A-like [Cricetulus griseus]
------------------------MVARKRKAGACGHEGSTP-----S--PPGY-SAIPVKF----------
-TKQ--QQ-----ASHYLYVKQHRV----------------RGDTQS--TWPPNKTLFVLNVPPYCTEECLS
RLLS-SC------GTIKTV---------DLKE----------------------------------------
-------KPD--HAESPKEAK-----SKFF-HPK-----------------PVPGFRVAYVVFQKPSGVSAA
LNL--K----GP--------LLVSTENHP--V----------------------------------------
-------------------------------KT-GIHK----------------WISE-Y-QDSVLDP-EAL
RVEVDTFMEAYDK-------KIAEEET------------KAK--EEEGVPD-EEGWVKV-TRR-GHRPVL--
--------PR---TEAASLRVL----ERE--KRKRARKEL--LN--FYAWQHRETKMEHLAQLRKKFEEDKQ
RIELMRAQR-KFR----------PY---------------------------------------------
>M_musculus_257467556 gi|257467556|ref|NP_083377.3| ribosomal RNA-processing protein 7 homolog A [Mus musculus]
------------------------MVSRRKKRKAGGHEESIP-----S--PPGY-SAVPVKF----------
-SAK--QQ-----APHYLYMRQHRV----------------RQGTQS--TWPPDRTLFILNVPPYCTQESLS
RCLS-CC------GTIKTV---------ELQE----------------------------------------
-------KPD--LAESPTEPK-----SQFF-HPK-----------------PVPGFQVAYVVFQKPSGVSAA
LNL--K----GP--------LLVSTESHL--V----------------------------------------
-------------------------------KS-GIHK----------------WISD-Y-EDSVLDP-EAL
RMEVDAFMEAYDK-------KIAEEEA------------KAK--EEEGVPD-EEGWVKV-TRR-GRRPVL--
--------PR---TEAASLRVL----EKE--KRKRARKEL--LN--FYAWQHRETKMEHLAQLRKKFEEDKQ
RIELMRAQR-KFR----------PY---------------------------------------------
>R_norvegicus_194474082 gi|194474082|ref|NP_001124040.1| ribosomal RNA-processing protein 7 homolog A [Rattus norvegicus]
------------------------MVSRRKKQKAGGHEGSVP-----S--PPGY-SAVPVKF----------
-SEK--QQ-----ASHYLYMRQHRV----------------RQGTQS--TWPANRTLFILNVPPYCTQESLS
RCLS-SC------GTIKTV---------ELQE----------------------------------------
-------KPD--LAESPKEPK-----SQFF-HPK-----------------PVPGFQVAYVVFQKPGGVSAA
LNL--K----GP--------LLVSTESHP--V----------------------------------------
-------------------------------KN-GIHK----------------WISD-Y-EDSVLDP-EAL
RLEVDTFMEAYDK-------KIAEEET------------KAK--EEEGVPD-EEGWVKV-TRR-GRRPVL--
--------PR---TEAASLRVL----EKE--RRKRARKEL--LS--FYAWQHRETKMEHLAQLRKKFEEDKQ
RIELMRAQR-KFR----------PY---------------------------------------------
>M_domestica_334347685 gi|334347685|ref|XP_003341967.1| PREDICTED: LOW QUALITY PROTEIN: ribosomal RNA-processing protein 7 homolog A-like [Monodelphis domestica]
------------------------MAAGKKTRVEKAPAGALS--------PPGY-RAVPIQF----------
-SPE--RT-----ASHYLYLKEHRV----------------REGTGS--AWPPGRTLFVLNVPPYCPEERLA
QLFSDCC------GPVQSV---------KLHP----------------------------------------
-------KPDLSQRPGEPSTA---AASELF-RPK-----------------PVPGFQVAYLVFRKRASVQKA
VALQGP--------------LIVSTESCP--V----------------------------------------
-------------------------------KT-GIEK----------------WIAD-Y-AASLGDP-EAL
RVEVDKFMEEYDK-------KVAQEDA------------RAE--AEEGVPD-EEGWVKV-TRK-GRRPGL--
--------PR---SEAASLRVL----EKE--KRKKARKEL--LN--FYAWQHRETKMEHLAQLRKKFEEDKQ
RIPLMRAQR-KFR----------PY---------------------------------------------
>G_gallus_363727780 gi|363727780|ref|XP_416213.3| PREDICTED: ribosomal RNA-processing protein 7 homolog A [Gallus gallus]
-------------------------------MAAAEPRVAVT-----A--PPGY-TALAVKF----------
-GAR--QR-----SPHCLLVKEHRV----------------REGPGD--THPPQRTLFVLNVPPYCSADALS
RLFA-RC------GAVQSV---------DLRD----------------------------------------
-------KPG--PGEKAEKRT-----SKFF-TNG-----------------TATGFRVAYVVFRKPAGVQAA
KALSQE----GP--------LLISTESHP--V----------------------------------------
-------------------------------KT-GISK----------------WIAR-Y-ADSVVDR-EEL
KAEVDAYMQDYDK-------KIEEEEA------------KAA--KEEGVPD-EEGWVKV-TRK-GRKPGL--
--------PR---TEAANLRVL----ERE--KRKKARKEL--LN--FYAWQHRETKREHIAQLRKKFEEDKQ
RIALMRAQR-KFR----------PY---------------------------------------------
>M_gallopavo_326912072 gi|326912072|ref|XP_003202378.1| PREDICTED: ribosomal RNA-processing protein 7 homolog A-like, partial [Meleagris gallopavo]
---------------------------------------------------------LAVKF----------
-SAR--QR-----SPHCLLVKEHRV----------------REGPGD--THPPQRTLFVLNVPPYCSPDVLS
QLFS-CC------GAVQSV---------DLRD----------------------------------------
-------KPG--PGEKAEKRT-----SKFF-TNR-----------------TATGFQVAYVVFKKPDGVQAA
KALSQK----GP--------LLISTESHP--V----------------------------------------
-------------------------------KT-GISK----------------WIAR-Y-AESVVDR-EEL
KAEVDAYMQDYDK-------KIAEEEA------------KAA--KEEGLPD-EEGWVKV-TRK-GRKPGL--
--------PR---TEAANLRVL----ERE--KRKKARKEL--LN--FYAWQHRETKREHIAQLRKKFEEDKQ
RIALMRAQR-KFR----------PY---------------------------------------------
>I_scapularis_241570170 gi|241570170|ref|XP_002402667.1| rRNA processing protein RRP7, putative [Ixodes scapularis]
--------------------------------------MATS-----S--KGGF-QTLPVTF----------
-SSE--TR-----SSHTLFFKEHNV----------------REKDD---LKPPSRTLFVVNVPPYCTEECLK
RIFG-DC------GKVVKV---------WIQK----------------------------------------
-------TPS--AAAKPDVGT----TTFFP-NAS-----------------PVTGFMVAYVVFLKENSVKRA
LALSVT----EP--------RVLFPEGSP--A----------------------------------------
-------------------------------ASVGLAK----------------WCNE-Y-KSRFVDT-EAL
QKEVDVFMAAYDK-------RLEAEKA------------RAK--QMDGVPD-EEGWITV-TKY-GKRPVI--
--------PR---TDAVNRKIS----AAE--KKKRSQKEL--LN--FYSFQIRESKMEHIAQLRKKFEEDKR
RISLMKAAR-RFR----------PT---------------------------------------------
>D_rerio_62955127 gi|62955127|ref|NP_001017579.1| ribosomal RNA-processing protein 7 homolog A [Danio rerio]
------------------------------MAPSANKDACVI--------PGGF-TVLSLRF----------
-SEDDSAA-----ALHQVCVKEHRV----------------RSESNT--HRPADRTLFVLNVPPYCTQSVLS
GVFSRF-------GVVESV---------DVCV----------------------------------------
-------KPGAADSSASGVCE-------LF-RVQ-----------------EPQCFRVAYVVFRSAASVNAA
KRHPLH----DP--------LIASTAERP--V----------------------------------------
-------------------------------RT-GLRK----------------WIQQ-Y-SGSLVKA-SSL
QAAVDQFMEEFDT-------RKQQEAE------------RLQQEAEQQQED-EEGWVKV-TKG-SRGAKA--
-------RPH---TETANQRTL----QKE--EKKKQRKEL--LN--FYSWQHRNTQREHIAELRKKFEEDKQ
RIAVLRAQR-KFK----------PY---------------------------------------------
>O_niloticus_348511235 gi|348511235|ref|XP_003443150.1| PREDICTED: ribosomal RNA-processing protein 7 homolog A-like [Oreochromis niloticus]
--------------------------MAPSKKKHAKNQACVI--------PGGF-TVLSLQF----------
-SSD--SA-----ARHSLYVKEHRV----------------RAERSS--HRPLDRTLFVLNIPPYCSEDVVK
DLFSQF-------GSVQSV---------ELRD----------------------------------------
-------HPGSSQESGPKLSK-------FF-KPA-----------------EKQGFKVGYVVFQISSSLPAV
KSHPHD----VP--------LVVCTEHRP--V----------------------------------------
-------------------------------KT-GLQK----------------WIQQ-Y-TNSFIQP-EQL
QQKVDSFMEDYDK-------RKEEEAE------------RQKKEAEEEQED-EEGWVKV-TRG-HKGTKA--
-------RPH---SEAANQRTL----QRE--ITKKKRKEL--LN--FYTWQHRNTQKEHIAELRKKFEEDKQ
RIALLRAQR-KFR----------PY---------------------------------------------
>S_salar_213511666 gi|213511666|ref|NP_001135331.1| Gastric cancer antigen Zg14 homolog [Salmo salar]
---------------------------MAPSKTKHANQTCVI--------PGGF-TVLSLQF----------
-STD--SV-----AQHKICVKEHRV----------------RAEKTT--QRPLDRTLFVLNIPPYCSEGVIK
ELFSQF-------GPVQSV---------ELRE----------------------------------------
-------KPGSFEHSGPKLAK-------YF-TPA-----------------QKQGFRVGYIVFQKAISITAV
KSHPHD----VP--------LVVSTEQRP--V----------------------------------------
-------------------------------WT-GLQK----------------WIHQ-Y-KLSFSQP-DKL
QEAVDTFMQDYDK-------RKEEEAE------------WQKEAAEEQLED-EEGWVKV-TRG-KSGTKT--
-------RPH---SEVSNQKAL----QKE--SRKRKRKEL--MN--FYTWQHRNTQKEHIAELRKKFEEDKQ
RIALLRAQR-KFR----------PY---------------------------------------------
>N_vectensis_156395027 gi|156395027|ref|XP_001636913.1| predicted protein [Nematostella vectensis]
---------------------------------------MAT--------EFGF-RLLRVKF----------
-NES--CK-----SNHFLYFKKHSV----------------REEESL---RPSDKTLFVINVPPYCTKLAIK
KLFGKC-------GGVKSV---------YLHK----------------------------------------
-------QPGKVKETKTSLLN----------TDN-----------------EVKGFKVAYVVFKKPSSLDAA
LKLDPM----EV--------LLLSDEDNP-------------------------------------------
-------------------------------VLTGVKK----------------WSHE-Y-SLRYPDP-LTL
QEEIDTFMREFDK-------KEEQAKE------------AEK--MERGQPD-EEGWITV-GKG-GRKPGA--
-------------TKVDAAEIQ------E--KRKKKKKAL--VN--FYQFQQRETKREHIAQLRKKFEEDKK
KIAEMKAAR-RFR----------PY---------------------------------------------
>S_kowalevskii_291242375 gi|291242375|ref|XP_002741084.1| PREDICTED: CG9107-like [Saccoglossus kowalevskii]
------------------------------------MAAPMN-----S--VAGF-KVMPVKL----------
-NNK--SD-----VVRYFYYKEHNV----------------REKDSS---KPSDRTLFVVNIPAYCNEECLQ
RLFSQC-------GTVESV---------HFQQ----------------------------------------
-------KPGISKTKTAVEES-----TFFK-QVN-----------------LIKGYKVAYVIFKNPSGLQNA
KKFNYK----QP--------LLLSTEESP--I----------------------------------------
-------------------------------FA-GMKK----------------WCKE-Y-IDSIPDT-TEM
QKEIDEYMANYDR-------QELEEEE------------KTT--ELEGVAD-SDGWITV-TRK-GRKPGL--
--------AR---TEVNQTKAT----VQE--KKKREKTEL--LN--FYRFQFRESKREHIAQLRKRFEEDKE
KIVAMKAAR-KFK----------PY---------------------------------------------
>S_purpuratus_390340741 gi|390340741|ref|XP_785640.3| PREDICTED: ribosomal RNA-processing protein 7 homolog A-like [Strongylocentrotus purpuratus]
---------------------------------MSAHTVPHE--------VGGF-RVVPVKF----------
-SEK--SS-----AGHMLYYKEHSV----------------KESEDT---KPTDRTLFVVNVPPYCNEECLQ
RLFGGC-------GGVESV---------ILQA----------------------------------------
-------KAGKELDAMLEEIY----------PIR-----------------KTRGFKIAYIVFKDDSSVVRA
MKQKYK----EP--------FILSPEGDSGGL----------------------------------------
-------------------------------VT-GYRK----------------WCSE-Y-EARWEDP-KQL
QKKADDFMIEFDK-------RKHEEKE------------QAKV--EEGVPD-DDGWVTV-TRK-STKPVV--
--------AR---SERKQKRLQ----AKE--KKKREEKEL--MN--FYTFQSRESKREHIAELRMKFEEDKQ
RITQMRAAR-KFK----------PY---------------------------------------------
>T_adhaerens_195998576 gi|195998576|ref|XP_002109156.1| hypothetical protein TRIADDRAFT_52899 [Trichoplax adhaerens]
---------------------------------------MAA--------LKEF-LQMKVQF----------
-NEE--CQ-----NQHIMYYKRHTV----------------RQECQD---IPSNRTLFIINVPPYCTKNILR
QIFSLF-------GEIDDI---------YQLR----------------------------------------
-------QPANTIPQYAKEDS-----SSCF-RRQ-----------------LHTGFRVAYIVFKTPISLMKA
LKESCD----DT--------VVLANLEEP-------------------------------------------
-------------------------------PLVGYKK----------------WCQE-Y-AAERPAP-QLL
QSEIDQFMEDFQK-------REKLDES-----------------QNSNEPD-DDGWVTV-KRK-NKYPIF--
--------SN---EDQEQQQSK---------KKKKKKTDL--IN--FYRFEVRESKREHIAQLRKKFEEDKK
KIALMKETR-RFK----------PY---------------------------------------------
>A_gambiae_347966329 gi|347966329|ref|XP_321439.5| AGAP001656-PA [Anopheles gambiae str. PEST]
---------------------------------------MSS--------ADEF-TAIDLKY---------K
ESDT---------HCHQLFAKENAS----------------KATCKQ---KPPGRTLYVLNVPPYATEQALQ
HAFSSA-------GEIERV---------VLQE----------------------------------------
-------KPSSKESAPIERMD-----------------------------KDVFCFKVAYVVFAKPGALRKL
LKTKSI--------------NALHTEERP-------------------------------------------
-------------------------------LLTGVDK----------------WTKA-Y-HERIPNP-AAL
QQEIDQYMESYDR-------KIEEQKA----------------AESNNAVD-EDGWVTV-----SKKSSS--
------VFAQ---TQGVVKRLE----KKL--YEGQSEKEL--KN--FYTFQIRESKKNDIISLRKKYDRDLK
KMEQIKKAK-RFK----------PY---------------------------------------------
>A_pisum_240848733 gi|240848733|ref|NP_001155371.1| Gastric cancer antigen Zg14 homolog-like [Acyrthosiphon pisum]
---------------------------------------MEE--------CVGF-KVLPVKV----------
-NEN--SK-----AIRQLFLKMHIT----------------REKCAQ---KPEYQTLFVVGVPEFCDQKIMK
HAFRRC-------GKVKSV---------FFHN----------------------------------------
-------EPT--PIEPEILPS------KYF-IPK-----------------SIKGFKVAYVVFAHTSGLENA
LSMKCTES--EP--------FMLSTQSAP--I----------------------------------------
-------------------------------TN-IVNR----------------WCEN-Y-NENIVDE-KEL
QLEIDTYMSKYDK-------TSAAQMQ------------TEK---ETVDNEDEDGWKTV-TKK-GRNPGF--
--------AR---KEVIKNNIM----KNE--AKKKIKKTL--KN--FYRFQIKETKINQLMELRNKFDNDKS
KIELLKQSR-KFK----------PF---------------------------------------------
>D_ananassae_194761020 gi|194761020|ref|XP_001962730.1| GF14285 [Drosophila ananassae]
---------------------------------------MVE--------LDGY-TVVPLRT----------
-APD--VQ-----HCHSIYMREHFI----------------RLMDPN---KPKGRTLFLLNVPPYVTEKSLK
TFFSQV-------GTIEAV---------EFAA----------------------------------------
-------KPGKEETIKWYEGA----QEPFS-TTR-----------------PPFVFKVAYVVFEKSSSIGKA
LALKSI-----D--------LFKSSGECT--I----------------------------------------
-------------------------------KS-GMEL----------------WHED-YEKRFLLNA-EKT
KAQIRKYMIAYDK-------RERVAAE------------AAK----NSEAD-ADGWVTV-GKD-GRNAGF--
--------EQ---KESVINRVE----RKL--ASDKKTKEL--KN--FYTFQIRESKMQNIVEMRKKFEEDKR
KIELLKQSR-RFK----------PF---------------------------------------------
>D_erecta_194860080 gi|194860080|ref|XP_001969511.1| GG10149 [Drosophila erecta]
---------------------------------------MVE--------LEGY-VVVPLRT----------
-SPQ--AQ-----HCPSVYMREHFI----------------RLMDPN---KPKGRTLFLINVPPYVTEDSLR
MVFGRA-------GSIEAV---------EFAA----------------------------------------
-------KPGKEETIKWYKGT----GEPFS-TTK-----------------PPFIFKVAYIVFEKSSSIGKA
LAMQSI-----D--------LFNSSGECI--I----------------------------------------
-------------------------------KT-GMEL----------------WHEE-YESNYILDA-RKT
KLQISKYMAGYDK-------RERAAAE------------AAK----TGEAD-ADGWVTV-GKE-GRNAGF--
--------EQ---KASVIGRLE----EKV--AKGNKTKEL--KN--FYTFQIRESKMQNIVEMRKKFEEDKH
KIKLLKQSR-RFK----------PF---------------------------------------------
>D_melanogaster_19920786 gi|19920786|ref|NP_608981.1| CG9107, isoform B [Drosophila melanogaster]
---------------------------------------MVE--------LEGY-VVVPLRT----------
-TPK--AQ-----HCHSIYMREHFI----------------RLMDPN---KPKGRTLFLLNVPPYVTEDSLR
TVFGRA-------GSIEAV---------EFAA----------------------------------------
-------KPGKEETIKWYEGT----GEPFS-NTR-----------------PPFVFKVAYIVFEKNSSIGKA
LALKSI-----D--------LFNSSGECI--V----------------------------------------
-------------------------------KT-GMEL----------------WHEE-YDCNYLLDA-QKT
KLQISKYMAGYDK-------RERAAAQ------------AAK----TGEAD-ADGWVTV-GKE-GRNAGF--
--------EQ---KASVIGRLE----EKV--AKGNKTKEL--KN--FYTFQIRESKMQNIVEMRKKFEEEKR
KIGLLKQSR-RFK----------PF---------------------------------------------
>D_sechellia_195342894 gi|195342894|ref|XP_002038033.1| GM17973 [Drosophila sechellia]
---------------------------------------MVE--------LEGY-VVVPLRT----------
-TPD--AQ-----HCHSVYMREHFI----------------RLMDPN---KPKGRTLFLLNVPPYVTEDSLR
TVFGRA-------GSIEAV---------EFAA----------------------------------------
-------KPGKEETIKWYEGT----GEPFS-STR-----------------PPFVFKVAYIVFEKNSSIGKA
LALQSI-----D--------LFNSSGECI--I----------------------------------------
-------------------------------KT-GMEL----------------WHDE-YDSNYLLDA-QKT
KLQISKYMAGYDK-------RERAAAE------------AAK----TGEAD-ADGWVTV-GKE-GRNAGF--
--------EQ---KASVIGRLE----EKV--ARGNKTKEL--KN--FYTFQIRESKMQNIVEMRKKFEEDKR
KIGLLKQSR-RFK----------PF---------------------------------------------
>D_simulans_195576900 gi|195576900|ref|XP_002078311.1| GD22609 [Drosophila simulans]
---------------------------------------MVE--------LEGY-VVVPLRT----------
-TRD--AQ-----HCHSVYMREHFI----------------RLMDPN---KPKGRTLFLLNVPPYVTEDSLR
TVFGRA-------GSIEAV---------EFAA----------------------------------------
-------KPGKEETIKWYEGT----GEPFS-TTR-----------------PPFVFKVAYIVFEKNSSIGKA
LALQSI-----D--------LFNSSGECI--I----------------------------------------
-------------------------------KT-GMEL----------------WHDE-YDSNYLLDA-QKT
KLQISKYMAGYDK-------RERAAAE------------AAK----TGEAD-ADGWVTV-GKE-GRNAGF--
--------EQ---KASVIGRLE----DKV--ARGNKTKEL--KN--FYTFQIRESKMQNIVEMRKKFEEDKR
KIGLLKQSR-RFK----------PF---------------------------------------------
>D_yakuba_195473721 gi|195473721|ref|XP_002089141.1| GE18957 [Drosophila yakuba]
---------------------------------------MVE--------LEGY-VVVPLRT----------
-SPQ--AQ-----HCHSVYMREHFI----------------RLMDPN---KPKGRTLFLVNVPPYVTEDSLR
TVFGRA-------GSIETV---------EFAA----------------------------------------
-------KPGKEETIKWYEGT----GEPFS-TTR-----------------PPFAFKVAYIVFEKNSSIGKA
LALQSI-----D--------LFNSSGECI--V----------------------------------------
-------------------------------KT-GMEL----------------WHEE-YEGNYLLDA-RKT
KLQISKYMAGYDK-------RERAAAE------------AAK----TTEAD-ADGWVTV-GKE-GRNAGF--
--------EQ---KASVIGRLE----EKM--AKGNKTKEL--KN--FYTFQIRESKMQNIVEMRKKFEEDKR
KIELLKQSR-RFK----------PF---------------------------------------------
>D_pseudoobscura_198475905 gi|198475905|ref|XP_001357198.2| GA21547 [Drosophila pseudoobscura pseudoobscura]
---------------------------------------MEE--------IEGY-TVVPLRM----------
-SSD--AL-----HCHSVYMREHFI----------------RLMDPN---KPKGRTLFLLNIPPYVTEESLK
GFFKRA-------GNVESV---------QFAA----------------------------------------
-------KPGKDETIKWYEGT----NEPFS-NVR-----------------PPFIFKVAYVVFQKSSSIGKA
LAVPSI-----D--------LFHSSGEST--I----------------------------------------
-------------------------------KT-GMEL----------------WHEE-YENHYILDA-EKT
KAQITEYMADYDR-------RERAAAL------------AAK----NSEAD-ADGWVTV-GKE-GRNAGF--
--------EQ---KESVIGRLE----KKR--ENDTKTKEL--KN--FYTFQIRESKMQNIVEMRKKFEEDKR
KIELLKQSR-RFK----------PF---------------------------------------------
>D_willistoni_195434713 gi|195434713|ref|XP_002065347.1| GK15401 [Drosophila willistoni]
---------------------------------------MVE--------IEGY-KVVPLRM----------
-TPD--AK-----HCHSIYMREHFI----------------RLMDPN---KPKGRTLFLLNIPPYVTEASLK
VFFKQF-------GKVESV---------QFAA----------------------------------------
-------KPGREETIKWYEGL----DEPFS-NVK-----------------APFIFKVAYVVFEKGSSIGKA
LSIESL-----D--------LFNSSQECL--I----------------------------------------
-------------------------------KT-GMEL----------------WHEE-YEQKYLLDP-EAT
KKRIKLYMAGYDK-------RERAALE------------EAK----TSEAD-ADGWVTV-GKE-GRNAGF--
--------EQ---KESVIGRIE----NKL--AKDKKTKEL--KN--FYTFQIRESKMQNIVEMRKKFEEDKR
KIELLKQSR-RFK----------PF---------------------------------------------
>D_grimshawi_195030636 gi|195030636|ref|XP_001988174.1| GH10710 [Drosophila grimshawi]
---------------------------------------MPE--------IEGY-RVVPLRM----------
-SPD--AK-----NCHSVYMREHFI----------------RLMDPN---KPKGRTLFLLNVPPYVTEESLQ
TFFKTA-------GNVESV---------LFAE----------------------------------------
-------KPGRDETTKWYEGM----DVPFS-NAQ-----------------TPFKFKVAYVVFQKSSSIGRA
LAIQSL-----D--------LYNSSGECI--I----------------------------------------
-------------------------------KT-GMEL----------------WHEE-YEKNFMLDV-AKT
QTEIDAYMAAYDK-------SERAALA------------AAK--ASEADPN---GWVTV-GKE-GRNAGF--
--------EQ---KESVIGRIE----SKM--QKDKKTKEL--KN--FYTFQIRESKMQNIVELRQKYEEDKR
KIELLKQSR-RFR----------PF---------------------------------------------
>D_virilis_195385394 gi|195385394|ref|XP_002051391.1| GJ12494 [Drosophila virilis]
---------------------------------------MTE--------IEGY-RVVPLRM----------
-SPD--AK-----HCHSVYMREHFI----------------RLMDPN---KPKGRTLFLLNVPPYITEESLQ
TFFKRV-------GNVESV---------LFAE----------------------------------------
-------KPGRDETAKWYEGT----DVPFS-NVQ-----------------TPFKFKVAYVVFQKSISIGRA
LALESL-----D--------LYNSSGECL--I----------------------------------------
-------------------------------KT-GMEL----------------WHDD-YENNYILDV-EKT
QKEINDYMAAYDK-------RERAALA------------AAK--TSEADPD---GWVTV-GKD-GRNAGF--
--------EQ---KESVIGRIE----SKL--EKDKKTKEL--KN--FYTFQIRESKMQNIVELRQKYEEDKQ
KIELLKKSR-RFR----------PF---------------------------------------------
>D_mojavensis_195116363 gi|195116363|ref|XP_002002725.1| GI11291 [Drosophila mojavensis]
------------------------------------MVDLTE--------IEGY-RVVPLRM----------
-TPD--AK-----HCHSIYMREHFI----------------RLMDPN---KPKGRTLFLLNVPPYVTEASLQ
TFFKSK-------GKVESV---------LFAE----------------------------------------
-------KPGRDETEHWYEGL----DVPFS-NVE-----------------APFKFKVAYVVFEKSTTIGRA
LVIESI-----D--------LFNSSGECL--I----------------------------------------
-------------------------------KT-GMEL----------------WHDN-YVNKYILDA-EKT
QRQIDAYMAKYDK-------RERAALA------------AAK--TSEADPD---GWVTV-GKD-GRNAGF--
--------EQ---KESVVGRIE----RKM--EKDKKTKEL--KN--FYTFQIRESKMQNIVELRKKYEEDKQ
KIELLKKSR-RFR----------PF---------------------------------------------
>A_mellifera_328781045 gi|328781045|ref|XP_001120059.2| PREDICTED: ribosomal RNA-processing protein 7 homolog A-like [Apis mellifera]
---------------------------------MIMINKKNN--------LKGF-KTMWIRF----------
-NEE--TT-----DKHQIFFKEHSI----------------RNQEPE---HPRGRTLFMLNIPPYVTSENLK
RIFGDLC------GIVSNV---------YFI-----------------------------------------
---------------------------------------------------ISKGFKTAYIIFENESDLEKA
LEISDD----YI--------VTLNDGNNF-------------------------------------------
-------------------------------CLTGIRK----------------WCIE-Y-NRSVCNE-KKM
KEEIETYMQNYDK-------KIAEKII------------KEK--MMEEEVQNNDGWVTV-TGRKKRGQFA--
-------LSR---KESTINKVQ----HKE--EQKNKKKQL--LN--FYTFQIRESKKQNLAELRKKFELDKK
RLQDLKLKR-TFK----------PF---------------------------------------------
>B_impatiens_350396170 gi|350396170|ref|XP_003484465.1| PREDICTED: ribosomal RNA-processing protein 7 homolog A-like [Bombus impatiens]
------------------------------------MKSKTG-----G--LKGF-KTLWIRF----------
-DEE--TT-----DKHQLFFKEHSI----------------RNQESI---HPKGRTLFLLNIPPYITHKALI
KIFSDLC------GTVSKV---------YFVT----------------------------------------
----------------------------------------------------PKGFKTAYIVFEKESDLEKA
LEISEN----YV--------ITLNKEKKI--C----------------------------------------
-------------------------------FT-GVEK----------------WCLN-Y-NRSICNE-KEM
KKKIETYMQNYDQ-------KISEKIA------------KEK--AMEEEAE-NDGWVTV-TGRKKRGQFA--
-------LSR---KESTINKVQ----RKE--EQKNKKKQL--LN--FYTFQIRESKRQNLAELRKKFELDKK
RLQDLKSKR-TFK----------PF---------------------------------------------
>B_terrestris_340719141 gi|340719141|ref|XP_003398015.1| PREDICTED: ribosomal RNA-processing protein 7 homolog A-like [Bombus terrestris]
------------------------------MHNEAIMKSKTG-----S--LKGF-KTLWIRF----------
-DEE--TT-----DKHQLFFKEHSI----------------RNQEPI---HPKGRTLFLLNIPPYITHKALI
KIFSDLC------GTVSKV---------YFVT----------------------------------------
----------------------------------------------------PKGFKTAYIVFEKESALERA
LEISEN----YV--------ITLNKEKKI--C----------------------------------------
-------------------------------FT-GVEK----------------WCLN-Y-NRSVCNE-KEM
KKKIETYMQNYDQ-------KISEKIA------------KEK--AMEEEAE-NDGWVTV-TGRKKRGQFA--
-------LSR---KESTINKVQ----RKE--EQKNKKKQL--LN--FYTFQIRESKRQNLAELRKKFELDKK
RLQDLKSKR-TFK----------PF---------------------------------------------
>M_rotundata_383848771 gi|383848771|ref|XP_003700021.1| PREDICTED: ribosomal RNA-processing protein 7 homolog A-like [Megachile rotundata]
---------------------------------MTMKSKKHD--------LKGF-KTMWIQF----------
-AKK--SI-----DKHQLFFKEHSV----------------RHQLPE---HPRGRTLFVLNIPPYVTAEALQ
TVFSEIF------GNVTDI---------FFVT----------------------------------------
----------------------------------------------------PNGFKTAYIVFEKESALEEV
LDSSPD----FV--------ITINGEKNI-------------------------------------------
-------------------------------CFTGLQK----------------WRYE-Y-NNSICDE-DKL
KEEIKTFMEEYDR-------KIAEKKA------------NEK--AMEEQAQDNDGWITV-TGQKKRGEYA--
-------LSR---KESTITKVQ----YKE--EQKNKKKQL--LN--FYTFQIRESKKQNLAELRKKFELDKQ
RLQSLKSKR-TFR----------PF---------------------------------------------
>C_intestinalis_198419083 gi|198419083|ref|XP_002121115.1| PREDICTED: similar to ribosomal RNA processing 7 homolog A [Ciona intestinalis]
------------------------------------MENQDN-------------KVYQIKI----------
-KAQASCS-----SCHTLFITNKSK--------------------------PNVHVLLVSSIPPYCNQHTLH
RLFGKC-------GKILEV---------RLQK----------------------------------------
----HANKPINDDQTTDNFPP-----------------------------PPILGFKVAFITFQSNKGINEF
IKKTKS---TEP--------WLISNESTK--L----------------------------------------
-------------------------------IT-GLKK----------------WCLD-Y-IYEQPDP-KKL
KLEVDEYMTKYDA-------KVKQEQE------------EEI--ENDGIPD-DEGWVKV-SSR-GRNAGV--
--------SR---TETNQKKSK----RKE--KKKRKQNEM--FS--IYKYQVRESKRQKIAELREKFEEDKL
RIQAMKEAR-KFR----------PF---------------------------------------------
>A_queenslandica_340375212 gi|340375212|ref|XP_003386130.1| PREDICTED: ribosomal RNA-processing protein 7 homolog A-like [Amphimedon queenslandica]
-----------------------------------------------------M-DELKIKF----------
-STSRGSS-----SQHTIYCKRHSV----------------RQPSTK---IPNQRTLFTTGWPPYCGRDSIQ
ELFSRLV------GQVEGV---------YLQE----------------------------------------
-----------GTKAIENEQP------------------------------QTGGYMIGYIVFKEDEEVSRA
LSLCST--------------GSPPLSCCVGDT----------------------------------------
----------------------------------GLKK----------------WTRE-Y-QERYPVE-SLL
EKAAESGVTAYDE-------WVESEKK------------RKK---HLSEPD-EDGWVTV-T---KKTPIV--
--------------------------EKP--KRKKKKPQF--LM--LYAFQQREKQRERIAELRKKFQEDQQ
KVAAMRANR-KFK----------PF---------------------------------------------
>P_infestans_301108870 gi|301108870|ref|XP_002903516.1| conserved hypothetical protein [Phytophthora infestans T30-4]
--------------------------------------MSTK-----V--FSGY-HAIALPL----------
--PH--SS-----FHRFIYAKQHDA----------------KPGANAESVLATGRTAYLVNLPAYASEQWLR
ACLESV-------GAIQHV----------VAG----------------------------------------
-------SGGLFDEEDDEEDA----------------------------ATDCVVNRTAHVVFKAEESLDKM
LQADA---------------LETPAPQKP--C----------------------------------------
----------------------------------GLQA----------------YAAK-Y-RRNRPGL-SVI
KETADRYMATFDE-------MEAEDLR------------RRE--ELKNEVD-DDGFQTV-VNT---------
-------KKR---GIVQTEEVL----GRP--AKKQKSKEL--DN--FYRFQTREKKRTQLKTLRERFEEDRQ
LVDKMKKAN-KFR----------PE---------------------------------------------
>C_cinerea_169865017 gi|169865017|ref|XP_001839113.1| hypothetical protein CC1G_08839 [Coprinopsis cinerea okayama7#130]
----------------------------------MAASTSFK--------VNGF-TALPISY----------
-SKS---------STHYLYARAHAS--------------SNKKDPKQQNQLPNGRTLFLVNVPPDATERELV
MFFKQA-------GTVEKV----IF---DFDV---------------KELRKDEEGTDSEADEDEMD-----
-------LDGTADAESSEHPRKRQKIVKDE-PPK-----VVEL-PSRPHRTIRKTGLTAYVVFLDESSLSRA
LSPSSK---PRP--------WPTSSEEPS-------------------------------------------
----------------------------------GLSH----------------YITI-Y-ENLRPPL-DLI
QEHVDTYMELFEY-------KQAKEKQ------------KSKYLKGEAIVD-EDGFTLV-TRG-GAYGKT--
------LGGG---VAVATKQFQRSGATSR--TRPKKKKEK--EG--FYAFQKAEKQRTELMNLKKKWEEDKA
KVEKLKASR-RFK----------PY---------------------------------------------
>L_bicolor_170091372 gi|170091372|ref|XP_001876908.1| predicted protein [Laccaria bicolor S238N-H82]
-------------------------------------MSPAS-----S--INGF-TLIPVLY----------
-TPS---------TTHYIYARPHSS----------------SKAEIH-SVLPSGRTLFLVNIPPDTTERELI
LLFK-HC------GTVERV----VF---DFEA---------------KEPHHEEADSED-------------
-------DEDEDMEESDEQPR----KRRKT-SKSDIPTV-TPL-PSTSLRTLRRTGRPAHIVFLDSSSLDRA
MSASSK-----P--------RPWPTSEEP--R----------------------------------------
----------------------------------GAAH----------------YRAL-Y-ASLRPPL-DVV
REHADTSIELYEY-------QLAKEKQ------------KSKYLKGDAIVD-EDGFTLV-TRG-GAYGKT--
------LGGG---VGVASKRFQRAGESGRYRTKKKEKKEK--EG--FYAFQKAEKQRSALMDLKKKWEEDKA
KVEKLKASR-RFK----------PY---------------------------------------------
>S_commune_302693493 gi|302693493|ref|XP_003036425.1| hypothetical protein SCHCODRAFT_80170 [Schizophyllum commune H4-8]
------------------------------------MSAPTH--------VAGF-TVLPVSY----------
-SKS---------ATHYIYARAHQP---------------PKKQQDD--ALPAGRTLFLANIPPDATDREII
TFFKPS-------GTVEKVVLDFDL---AQEE---------------APVSSDSEDESMSEGEEGGQGVGED
QNADERPRKRRRKDKKPQPPT----VVPLP-EPP--------------LRKLGHTGRSAHVVFLDASSLERA
LTPPTS----PR--------PWPTDPDAP--I----------------------------------------
----------------------------------GLAH----------------YTAL-Y-DALRPPL-DVV
RAHADTYMDLYEF-------EQARAKR------------KSKYRKGEAIVD-EDGFTLV-TRG-GAYGQTLG
-GGVGVASKR---FQQTGEARS----NPG--RKKKASKDK--AG--FYAFEKAERQRKELIELKRKWEEDKE
KIEKLKASR-KFR----------PY---------------------------------------------
>S_japonicus_213407968 gi|213407968|ref|XP_002174755.1| gastric cancer antigen Zg14 [Schizosaccharomyces japonicus yFS275]
-------------------------------------MSSAA-----L--SE-F-TRFRLKL----------
-SDS---V------YHDCFLKEDAE---------------------------AENSIFLINVPSDATEKCIK
NIMSEL------GGRVVTV-----------------------------------------------------
---------------------------------------NPPL-SK-----NRSCNLKLHIQLLEENEVKRV
LKQASK-------------------KSLV--I-------------------------QW-------------
-------------------------PMT--QSS-GLER----------------FTRQ-Y-DRQFPRH-EVL
QESVDAYMNRVAK-------MEAERKK------------QLL--LARNQPD-EDGFITV-VRG-GRNRVG--
-------------NEEEAKAIL---------ARKKEVGIH--HN--FYRWQVREEKKKKLNDLVRKFEQDKQ
RIQQIRESR-RFK----------PY---------------------------------------------
>S_pombe_19113125 gi|19113125|ref|NP_596333.1| rRNA processing protein Rrp7 (predicted) [Schizosaccharomyces pombe 972h-]
-------------------------------------MDKLK-----E--KG-F-VKLEIYL----------
-ENK---K-----RLHSIFLKEDTE----------------DV---------EKKSLYLINVPITTTEKILK
RAISQL------GGRIVNI-----------------------------------------------------
---------------------------------------YPNI-SG-----LLKSGTHLRVKLVEPAEVKQV
IKAASK-------------------KTTS--L-------------------------PW-------------
-------------------------KFT--QHT-GLKRKNMVIIFLEILMCLIGYVES-Y-DRQFVNP-RVL
AESVDSYMKRVTK-------KEIAEKR------------RLF--AMKNQPD-EDGFVTV-VRS-GRAPVG--
-------RPQ---DA-----------ERQ--LEKKKDTGI-HKD--FYRFQLREKKKKALLDLAHKFEFDKQ
RIQQLKEKR-QFK----------PY---------------------------------------------
>Y_lipolytica_50548661 gi|50548661|ref|XP_501800.1| YALI0C13596p [Yarrowia lipolytica]
-----------------------------------------------M--SG-Y-ETLPLKM----------
--PK---G-----NTHYLYMKKDDN------------------SAAS-----EDSTIFVCNLPADSTLSHIK
ALCQS-L----GGSIVESF---------EWVN---VSRNV--------------------------------
---------------------------RAE-SLT-----------------HGLSGGCGRIHMVDAASCNRV
LSQAKK------------------NATCG--V-------------------------KW--------DAKLT
-------------------------------IG-GKQR----------------YQLL-W-KYCFPAP-DDL
QAEVDYFMEEFAA-------REEEEKK------------VEK--TGRTVVD-ADGFTTV-VKTQKKKSLA--
------MQEA---AKQQAEEMK----LAE--IKRREKREK--KD--FYRFQIREYKKEQMTDMLTKFKEDQE
KVKQYKESG-RFN----------PY---------------------------------------------
>M_globosa_164659998 gi|164659998|ref|XP_001731123.1| hypothetical protein MGL_2122 [Malassezia globosa CBS 7966]
---------------------------------------MQE--------MSGF-TALPVSY----------
-END---------TVHYMYIKIHAS----------------SNDDAT---YPINRTLFVVNVPPDTTSKTLR
DLFRKA-------GSVESI---------YLHN-------------------------------VLDSKGEDA
TVPAPRPKQGTGPPDVEPLPS-------LEPTDR-----------------LLGSSSSAHVVFLDTTSLERA
IRLPKR-----FENKPHVWKLSRGKDERL--I----------------------------------------
----------------------------------GVSY----------------LIER-F-RRHRPPH-EAI
KKHADSAIARYSWIRSHPQWLMEQRARGDTTTSLGVGIKAASMGENGELLD-EDGFVIV-QRG-NKYGRS--
-------GGE---DNTFAAITPEFEEELRQHPEKKKSKEL--TD--FYRFQFREKKRQQFASLRAQFEADKK
KIAQRKASF-RFK----------PLYCYVASS--------------------------------------
>M_pusilla_303281090 gi|303281090|ref|XP_003059837.1| predicted protein [Micromonas pusilla CCMP1545]
MAKAAAATARGSKRRAASDADATPSSGKKAKKNAKKSKSSAKKRSDGD--AHGW-RPLPVRL----------
---DFGSA-----FTRHLFVRVPSA----------------NAAEGA----TEGTALFVAAIPLGWTRAHLR
ELFEENF------GAVEET---------SLVT----------------------------------------
------------LDAAPDVAG-------------------------------------GLVRFASASGAKKA
LAASVR--GGDA--------LDPPASLAPTSI----------------------------------------
----------------------------------GLEK----------------WVGH-H-RHARPGS-EAL
GRRIDEWFEAFEA-------EEARKEA------------AAK---AAGEGD--DGWTVVEAKR-GRRKTT--
--------DD---EGTAVGGIRAATADA---RRTAGPTPR--EN--FYRFQQREKRRGELFELKQKFEVDKE
RVAKLKASR-KFR----------PL---------------------------------------------
>A_benhamiae_302511667 gi|302511667|ref|XP_003017785.1| ribosomal small subunit assembly protein, putative [Arthroderma benhamiae CBS 112371]
--------------------------------------MVTS-----V--GG-Y-SVLPVLL--PNS---NS
KGES---E-----TTHYLYIQAHAP----------------RLPDAD-----SGRSLFVVNVPVTSTETHFR
HLFGTQL----GSGRVERV---------QFQHDE-ASRRG----------LGSQESSTSTE--VTA------
N----KKRKRGEEESAEEYAS------RLS-TIK-----LPGA-WDRP---LRPSGSHAVVTFVDRPSMEAS
LRAINK-----R--------KKSSK--TT--I-------------------------TW--------GHNLE
EETAEYYDDD-----NNNNGKSSKKGLC---RL-GSAR----------------YNRH-A-QLRYPSR-SEL
LKSVNEYMSVLSK-------LEEARER------------EAR--RQGNVVD-EDGFITV-TRG-PKRAVD--
-------AGR---EEEMRELVA---------RQREKSKGL--ED--FYRFQMREKRKERQGELLRRFEEDKR
RVEEMKRRRGRVV----VIITSDPRRSTASLA--------------------------------------
>T_verrucosum_302662144 gi|302662144|ref|XP_003022730.1| ribosomal small subunit assembly protein, putative [Trichophyton verrucosum HKI 0517]
--------------------------------------MVTS-----M--GG-Y-SVLPVLL--PNS---NS
KGES---E-----TTHYLYIQAHAP----------------RLPDAD-----SGRSLFVVNVPVTSTETHFR
HLFGTQL----GSGRVERV---------QFQHDE-ASRRG----------LGSKESSTSTE--VTA------
N----KKRKRGEEESAEEYAS------RLS-TIK-----LPGA-WDRP---LRPSGSHAVVTFVDRPSMEAS
LRAINK-----R--------KKSSK--TT--I-------------------------TW--------GHNLE
EETAEYDDNDDDNNNNNNNGKSSKKGLC---RL-GSAR----------------YNRH-A-QLRYPSR-SEL
LKSVNEYMSVLSQ-------LEEARER------------EAR--HRGNVVD-EDGFITV-TRG-PKRAVD--
-------AGR---EEEMRELVA---------RQREKSKGL--ED--FYRFQMREKRKERQGELLRRFEEDKR
RVEEMKRRRGRVIVSIRLYTSMSING--------------------------------------------
>T_rubrum_327296682 gi|327296682|ref|XP_003233035.1| ribosomal small subunit assembly protein [Trichophyton rubrum CBS 118892]
--------------------------------------MVTS-----V--GG-Y-SVLPVLL--PNS---NS
KGES---E-----ATHYLYVQAHAP----------------RLPDAD-----SGRSLFVVNVPVTSTERHFR
HFFGTQL----GSGRVERV---------QFQHDE-ASRR-----------LGSKESSTSTSTGVTT------
N----KKRKRGEEESVEEYAS------RLS-TIK-----LPGA-WDRP---LRPSGSHAVVTFVDRPSMEAS
LKAINK-----R--------EKSSK--TT--I-------------------------IW--------GHHLE
EATAE--DDT-----SNNNSKSNKKGLC---PL-GSAR----------------YHRH-A-QLRYPSR-SEL
LKSVNEYMSVLSK-------LEEARER------------EAR--RRGNVVG-EDGFITV-TRG-PKRAVD--
-------AGR---EEEMRELVA---------RQREKSKGL--ED--FYRFQMREKRKERQGELLRRFEEDKR
RVEEMKRRRGRVI----------PEE--------------------------------------------
>A_gypseum_315043935 gi|315043935|ref|XP_003171343.1| hypothetical protein MGYG_05890 [Arthroderma gypseum CBS 118893]
--------------------------------------MATS-----V--GG-Y-SVLPVLLRSSSS---SS
RDEN---E-----ATHYLYIQAHAP----------------RLPDAD-----SGRSLFVVNVPVTSTERHFR
HLFGTQL----GSGRVERV---------QFQHDDAASRRS----------KGTKEDTSTSN--STS------
NEMNTKKRKRGEEESAEEYES------RLS-TIK-----LPPA-WDRP---LRPSGSHAVVTFVDRPSMEAS
LKAITR-----R--------KKSSKKTTT--I-------------------------TW--------GESIE
----DYDDED---------KDDSKKGVY---PL-GSAR----------------YNRH-A-QLRYPSR-SEL
LKSVNEYMSVLSK-------AEEARER------------EAR--RRGNVVD-EDGFITV-TRG-AKKAVD--
-------AGR---EEEMRELAA---------RQREKSKGL--ED--FYRFQMREKRKERQGELLRRFEEDKR
RVEEMKRRRGRVV----------PEE--------------------------------------------
>A_capsulatus_154279520 gi|154279520|ref|XP_001540573.1| conserved hypothetical protein [Ajellomyces capsulatus NAm1]
--------------------------------MAPKRLSPQS-----I--SG-Y-SVLPIEL--PPV---PS
-FPT---S-----ATHYLYLRPHEP----------------KVPDPD-----SARSIFIVNVPVSTTETHLR
HLFGAQL----SAGRVERV---------EFHG---TASEK----------PSTTT---T-----IT------
SNPKKRKR-----DTTDELQV------ELD-ATA-----LPRT-WDRE---LHTSGAHAIVVFVDRPSMEAS
LKAAKR-----A--------AK-TH--AK--I-------------------------IW--------GQGID
--------------------NEKDNRFP---AL-GIQR----------------Y-KSHN-RLRYPAR-AEL
LRIVNDYMSIFGR-------FEEARSR------------EAA--RGAEVLD-EDGFVKV-TRG-PKINDV--
--------AR---EEELRALME---------KHKEKSKGL--QD--FYRFQMREKKKERQTELLKKFEEDKR
KLEEMKRRRGKVK------LGATPSMP-------------------------------------------
>C_posadasii_303315827 gi|303315827|ref|XP_003067918.1| hypothetical protein CPC735_042170 [Coccidioides posadasii C735 delta SOWgp]
----------------------------------MGREYPLS-----L--SG-F-TVLPLEL--PPL---PS
-LPK---A-----ATHFLYLQPHQP----------------RIPDPD-----SSRSLFLVNVPITATEAHFK
HFFGTQL----CAGRVESV---------RFQD---VQSTS----------SAPVVK-PS---AQLS------
KG-KKRKR-----ETVEELEQ------ELK-SIR-----LPKT-WDRE---LQNPGAHAVVVFVDKPSMEAS
LKAAKK-----A--------AK-SR--TK--I-------------------------VW--------GQGIE
---------------------D---KLP---PL-GSQR----------------YENH-N-RLRYPPR-EEL
KRIANEYMLVFDR-------LEEARAR------------EAT--TGAQVPD-EDGFITV-VKG-PKHNPD--
---------R---EDELKALAE---------KQKEKNKGL--ED--FYRFQTREIRKEKQNELLKGFEEDKK
KVEEMKKRRGKIR----VSSISLSC---------------------------------------------
>U_reesii_258576825 gi|258576825|ref|XP_002542594.1| conserved hypothetical protein [Uncinocarpus reesii 1704]
----------------------------------MGRDYPLN-----I--SG-Y-TVLPLEL--PPL---PS
-LPK---P-----ATHFLYLQPHQP----------------KIPDPA-----AARSLFIVNVPITSTEIHFR
HLFGIQL----SAGRVESV---------RFHE---ASGKE----------SGAVAPAPN---PDHT------
RG-KKRKR-----ETAEELEK------QLE-TIQ-----LPHT-WDRE---IHTPGAHAVVVFVDKPSMETS
LKAAKK-----A--------AK-SA--SK--I-------------------------VW--------GEGIE
---------------------T---RLP---PL-GLQR----------------YENH-I-RLKYPPK-EDL
LRMVNEYMTIYDR-------LEQARAR------------EAT--AGGQVPD-ADGFITV-VKG-PKRNPD--
------------REEELKALAE---------KQKDRNKGL--ED--FYRFQMRERRKEKQNQLVKQFEADKK
KVEEMKKRRGKIR----------PE---------------------------------------------
>A_clavatus_121709152 gi|121709152|ref|XP_001272324.1| conserved hypothetical protein [Aspergillus clavatus NRRL 1]
----------------------------------MKKQA-IE-----V--AG-Y-AVLPLQL--PES---PC
-LAE---P-----ATHYLYLRPHEP----------------RIPDVD-----TPRSLFVVNVPVDTTELHLR
HLFGTQL----SAGRVEKV---------HFEG---VPTKK----------KGAVAI-TQ---GNVS------
KN-KKRKR-----VTTDDLEG------QLE-EIS-----LPST-WDRE---LQKSGAHAVVVFADKSSMEAS
LKAASK-----A--------AK-KG--TT--I-------------------------VW--------GEGLD
---------------------D---RLP---AL-GLQR----------------YLNH-H-QASYPAR-ADL
LRTVNDFMTVFTH-------VAEARKR------------EEA--RRVQEPD-EDGFITV-TSG-PKLTST--
--------AH---EDEARALLE---------KQKKKSEGL--GD--FYRFQSREKRKERQHELLRRFDQDRR
KLEEMKRRKGKIR----------PE---------------------------------------------
>A_fumigatus_70982366 gi|70982366|ref|XP_746711.1| ribosomal small subunit assembly protein [Aspergillus fumigatus Af293]
----------------------------------MKRQY-LE-----I--AG-Y-AILPIQL--PEA---RA
-FPK---P-----ATHYLYLRPHEP----------------RIPDAD-----SPRSLFVVNVPIDTTEVHLR
HLFGTQL----SAGRVEKV---------HFEG---VPT-K----------KGSVAI-TQ---GSVS------
KS-RKRKR-----VTADELQD------QLD-GIS-----LPST-WDRK---LQKSGAHAVVVFADKSSMEAS
LKAVTK-----A--------AK-KE--TK--I-------------------------VW--------GEGIE
---------------------D---RLP---AL-GLQR----------------YLNH-C-QASYPNR-ADL
LRTVNDFMTVFTQ-------VAEARKR------------EDA--RRAQEPD-EDGFITV-TSG-PKLTSI--
--------AH---EEEARALVE---------KQKKKQEGL--QD--FYRFQSREKRKERQNQLLKRFDEDRK
KLEEMKRRKGKIR------VSYFPQSHFGTF---------------------------------------
>N_fischeri_119489211 gi|119489211|ref|XP_001262857.1| hypothetical protein NFIA_114930 [Neosartorya fischeri NRRL 181]
----------------------------------MKSQY-LE-----I--AG-Y-AILPVQL--PES---RA
-FPK---P-----ATHYLYLRPHEP----------------RIPDAD-----SPRSLFVVNVPIDTTEVHLR
HLFGTQL----SAGRVEKV---------HFEG---VPT-K----------KGSVAI-TQ---GSVS------
KS-RKRKR-----VTADELQD------QLD-DIS-----LPST-WDRE---LQKSGAHAVVVFADKSSMEAS
LKAATK-----A--------AK-KG--AK--I-------------------------VW--------GEGIE
---------------------D---RLP---AL-GLQR----------------YLNH-C-QASYPNR-ADL
LRTVNDFMTVFTQ-------VAEARKR------------EEA--RRAQEPD-EDGFITV-TSG-PKLTSI--
--------AH---EEEARALVE---------KQKKKQEGL--ED--FYRFQSREKRKERQNQLLKRFDEDRK
KLEEMKRRRGKIR------VSHFPQSHFGTF---------------------------------------
>A_niger_317033246 gi|317033246|ref|XP_001395133.2| ribosomal small subunit assembly protein [Aspergillus niger CBS 513.88]
-----------------------------------MKKD-LE-----I--AG-F-SILPLHF--PAT---PA
-FPK---P-----ATHYLYLRAHEP----------------RIPDAD-----TPRSMFIVNIPVDTTETHLR
HLFGTQL----SAGRVERV---------EFEA---VPTKK----------KGMQAT-PQ---GNIA------
SS-KKRKR-----VTADELQA------QLD-DVD-----LPAT-WDRQ---LQKSGSHAIVVFADKPSMEAS
LKAARK-----A--------AK-KG--TE--I-------------------------VW--------GEGVE
--------------------GD---RVP---AL-GLQR----------------YITH-E-QLRYPDR-AEL
LRTVNDYMTVFTQ-------VAEVRKR------------EEA--RRAQEPD-EDGFITV-TSG-PKLAEA--
--------AH---EDEAKELIE---------KQKEKSKGL--ED--FYRFQSREKRKEKQNQLLKKFDDDRR
KLADMKKRKGKIA----------PE---------------------------------------------
>A_oryzae_317155986 gi|317155986|ref|XP_001825495.2| ribosomal small subunit assembly protein [Aspergillus oryzae RIB40]
-----------------------------------MGKD-LE-----I--AG-Y-TVLPLRL--PPA---ES
KRAK---P-----ATHYLYLRPHEP----------------RIPDAD-----TPRSLFVVNVPIDTTELHLR
HLFGSQL----AAGRVERV---------HFEA---VPTKK----------KGGMTT-AHSMVANVS------
KS-KKRKR-----VTVDELQN------QLD-DVA-----LPST-WDRE---LQKSGAHAVVVFVDKPSMVAS
VKAAKK-----A--------GKRKD--GE--I-------------------------VW--------GEGLE
---------------------D---RLP---QL-GLQR----------------YLNH-E-EVRYPPR-AEL
LRTVNDFMTMFEA-------VAEARRK------------EQA--LRAQEPD-EDGFITV-TSG-PKLTSV--
--------AH---EDEARELIE---------KQKQKSQGL--ED--FYRFQSREKRKERQNELLKKFDEDKK
KLEEMKKRKGKIR----------PE---------------------------------------------
>P_marneffei_212546045 gi|212546045|ref|XP_002153176.1| ribosomal small subunit assembly protein, putative [Penicillium marneffei ATCC 18224]
-------------------------------MPKKSSTAITE-----I--SG-Y-TVLPIKL--PPA---LP
SFPE---L-----VTHYVYLRPHEP----------------RIPDPD-----AARSLFLVNVPIDTTELHLR
HLFSSQL----SAGRVERV---------QFEG---VFRSS----------TSNTTATTAVIKADTS------
ETQQGKKRKRQDVITSAELET------QLR-SAG-----FPST-WDRE---LHPSGSHAIVTFVDRPAMEAS
LKAVRK----YA--------AKEKK--SP--V-------------------------IW--------GEGIE
---------------------D---RIA---TL-GTTR----------------YRKHVA-KLRYPPA-DEL
LSIVNNYMSLYTQ-------WEETCAA------------EAS--RRAAEPD-EDGFITV-TRG-PRFTDV--
--------AR---EEEVKELVE---------KQRKREEGL--GD--FYRFQTREKRKERQNELLRKFDEDKR
KIEKLKKSRGRIM----------PEGM-------------------------------------------
>T_stipitatus_242824538 gi|242824538|ref|XP_002488279.1| ribosomal small subunit assembly protein, putative [Talaromyces stipitatus ATCC 10500]
-------------------------------MPKKSSTAITE-----V--PG-Y-AVLPVKL--PPA---SS
SFPK---P-----VTHYVYLRPHEP----------------RIPDAD-----TARSLFLVNVPVDTTELHLR
HLFSSQL----SAGRVERV---------HFEG---VFSRS----------NAVTTHAPTTNTAETL------
SSQQGKKRKRQDVVTSQELET------QLR-SAG-----LPST-WDRE---LHTSGTHAIVTFVDRPAMEAS
LKAVRK----FA--------SKERK--SP--I-------------------------IW--------GEGIE
---------------------D---RLP---AL-GITR----------------YRKHAS-KIRYPSA-DEL
LSIVNNYMALYTQ-------WEETRAL------------EVS--RRAAEPD-EDGFITV-TRG-PRFTDV--
--------AR---EDEVKELVE---------KQRKREEGL--GD--FYRFQTREKRKERQNELLRRFDEDKR
KIEKLKKSRGRIM----------PEGM-------------------------------------------
>P_chrysogenum_255954941 gi|255954941|ref|XP_002568223.1| Pc21g11920 [Penicillium chrysogenum Wisconsin 54-1255]
----------------------------------MKSES-VQ-----V--EG-Y-TTLPLQL--PTT---PL
-FPY---P-----ATHYLYLRPHEP----------------RIPDPD-----STRSLFLVNVPIDTTEAHLR
HLFGTQL----AAGRVERV---------QFED---VQTKK----------RAAATT-TE---TNLT------
HSKKKRKR-----VTADDYER------YLD-DIN-----LPSI-WDRK---LQKSGAHAVVIFADKPSMETS
LKAASK-----A--------SK-RG--TT--I-------------------------IW--------GDGLP
--------------------TD---RIP---AL-GLNR----------------YVAH-E-RMQYPDR-GAL
LRTVNEFMTTFTQ-------VSEARKR------------EDH--KRLAVPD-EDGFVTV-SHG-PKLNSV--
--------AR---EEEMRELVE---------KQKKKAEGL--ED--FYRFQSREKRKERQNQLLRRFDEDKK
KLAEIKARKGKIR------VSFSLSLVRLVFGSGADFLYSLNDLVHDSMAFWVSFFAGRIKGSRWCPMYM
>A_dermatitidis_261199105 gi|261199105|ref|XP_002625954.1| meiotic recombination protein DMC1 [Ajellomyces dermatitidis SLH14081]
--------------------------------MAPKLVFPLS-----I--SG-Y-SVLPIDL--PPM---PS
-FQS---S-----ATHYIYLRPHEP----------------RVPDAD-----SARSLFVVNVPVTATETHLR
HLFGAQL----SSGRVERV---------EFHD---TAVKK----------PPTITVTPT-----PV------
TNAKKRKR-----DSTEELQV------ELD-TIE-----LPRT-WDRE---LHPSGAHAVVIFVDPSQHGSQ
SQGGEK------------------------------------------------------------------
----------------------------------GIQR----------------VQKPIT-NYDIPHA-LEL
LRTVNNYMSIFGR-------FEEARAR------------EAA--KGAEGGG-DEGLAE--------------
-------------------------------KHKEKTKGL--ED--FYRFQTREKRKERQTELLRKFEEDKR
KVEDMRRRRGKVR----------PE---------------------------------------------
>T_melanosporum_296422871 gi|296422871|ref|XP_002840982.1| hypothetical protein [Tuber melanosporum Mel28]
------------------------------------MSPPAQ-----I--PD-Y-TILPITL--PAT---L-
-LVG---A-----ATHYLYLRRHAP----------------KQPAPH-----DPRSLFVVNVPVDATTAHLR
ALF-TGI----GGGRVEKV---------VFDG-------D----------RGATC-----------------
-GIGKRKR---------HLAH------EVG-DGG-------EV-WDRQ---LCKSGSTAVVVFVDKPSMDVS
MKTARK-----L--------SK-----TR--V-------------------------VW--------GDGIS
----------------------EGVNIP---AL-GIPR----------------YLAH-H-NLTHPSK-THL
QASVNTFIAAFEA-------EERVRLR------------ALA--KRRREPD-DDGFITV-VRG-GRTAPA--
---------R---QEEANAVLE---------KKGKDKHEG------FYRFQVRQERKNRQMELLKKFEEDKK
RVADRKNLR-RFK----------PL---------------------------------------------
>B_fuckeliana_154305504 gi|154305504|ref|XP_001553154.1| hypothetical protein BC1G_08521 [Botryotinia fuckeliana B05.10]
-----------------------------------MSKAPTT-----I--GDNY-TVLPIAI--PST---PA
-YPV---T-----TTHHIYLRQHAP----------------KIPSEN-----DSRSLFATNLPIDSTDIHIR
SVFAALI----GVGRVEDV---------RFDG---EKEEV----------------VAQKLVE-TT------
SQSKKRKR---GSETEIDTS-------------------LPQG-WDRQ---LRIKGRTAVVLLVDEKSVESV
LKAARK-----T--------CKSGKESKY--P-------------------------VW--------GAGAE
---------------------S---KVP---AL-GSAR----------------YAMR-Q-ELRFPDK-LAV
QRSVDAFMTKFNS-------KEEERER------------ERK--RLRNVPD-EDGFVTV-VRG-GRTGPA--
---------R---NEAAEEKRR---EMAE--KEEKRRKEL--EDAGFYRWQGREKRKKEVGELVKKFEEDRK
RVEGMREKRGRFR----------PER--------------------------------------------
>S_sclerotiorum_156065969 gi|156065969|ref|XP_001598906.1| hypothetical protein SS1G_00995 [Sclerotinia sclerotiorum 1980]
-----------------------------------MSKIPTI-----I--GDNY-TILPVAI--PST---PA
-YPI---T-----STHHIYLRQHTP----------------KIPTEN-----DSRSLFATNLPIDSTDVHIR
SIFAALI----GVGRVEGV---------RFDG---EKEEI----------------TEQQQIE-TV------
SQSKKRKR---GNNVQIDTS-------------------LPQG-WDRQ---LRFKGRTAVVLLVDEKSVESV
LKAARK-----T--------CKSGKESKY--P-------------------------VW--------GSGTE
---------------------G---KVP---AL-GSAR----------------YAKR-Q-ELRFPDK-LAV
QRSVDAFMTNFNS-------KEEERER------------ERK--RLRNVPD-DDGFVTV-VRG-GRTGPA--
---------R---SEAAEEKRR---EMAE--KEEKRRKEL--EDAGFYRWQGREKRKKEVGELVKRFEEDRK
RVEGMREKRGRFR----------PER--------------------------------------------
>G_zeae_46137493 gi|46137493|ref|XP_390438.1| hypothetical protein FG10262.1 [Gibberella zeae PH-1]
-MVGTGLFFLMLQTGPPSILLDHLNIGLIPQTSSAMAPLEES-----G--DQ-F-SVLPVKI--LAT---SS
-YPE---T-----AIHEIRIRKNAP----------------KIPTAN-----DSRSLFLKNIPADSTEPHFR
SIFTQLV----GAGRFETI---------TFEN---ESRTT-------------LVVDPEQATK-VA------
GFAKKRKR---GDVEAEERER------EEE-AAQ-----LPQI-WLRR---VQRSSSTAVVLLADEKSVQLV
LKAISK-----L--------QKN---KKY--P-------------------------TW--------GNDLS
---------------------D---DVP---DL-GSEW----------------IASH-L-QLSRVDK-TAT
QKAVHAFFTSFNR-------KEKEAVE------------LAK--RLRNEPD-EDGFVTV-TRG-GRAAPA--
--------SR---NEAEEAKRR----MIE--RETKKKSEL--KD--FYRFQMRERRKAEQMALLKRFQDDRR
KVDAMREKRGKFR----------PET--------------------------------------------
>N_haematococca_302912643 gi|302912643|ref|XP_003050745.1| predicted protein [Nectria haematococca mpVI 77-13-4]
-----------------------------------MAPIEET-----G--DQ-F-AVLPIKI--PAT---PS
-YPE---T-----AIHEVRVRRNAP----------------KIPTAN-----DSRSLFLKNIPVDSTEPHFR
AVFSELV----GAGRFESI---------VFED---ETRRA-------------LPIDPAQAIK-VT------
GFARKRKR---GDVEAEEQDR------EEQ-AAQ-----LPQI-WTRR---VQRSSSTAIVLLADDKSVQLV
LKALAK-----L--------QKT---KKY--P-------------------------SW--------GKGVS
---------------------D---VVP---AL-GSSW----------------IASH-L-QLSRVDK-PAT
QKAVHAFFNTFNR-------KEKEAAE------------LAK--RLRNEPD-EDGFVTV-TRG-GRAAPA--
--------SR---NEAEEAKKR----MIE--KDSKKKSEM--KD--FYRFQMRERRKAEQVALLRRFQEDKK
KVDAMREKRGKFR----------PET--------------------------------------------
>M_oryzae_389641199 gi|389641199|ref|XP_003718232.1| hypothetical protein MGG_00764 [Magnaporthe oryzae 70-15]
-------------------------------MKEATSPTRSS-----I--GD-F-SILPISF--PPT---RA
-YPK---A-----VLHHVYVRRNAP----------------KIPTPD-----DDRSLFLANVPVDSTEAHFR
AVFAALA----GAGKFESI---------SFED---DRRRR------AAESSSVRPSQALRLAQTAH------
GSSKKRKR---GEAEEEEEED------DQE-TART----LFET-WPRR---LHGSGGTAVVLLADERSVSVV
LKAVGK-----V--------HKS---KKY--P-------------------------VW--------GAGVE
---------------------E---SAA--TEL-GAPW----------------LRDH-N-RLCFPNK-VVV
QSAVDSFFILFNK-------REKEAAE------------LAK--RMRSEPD-EDGFVTV-VRGAGRSAPA--
--------RR---DEAEEARRR----LAE--REERKRQEL--GG--FYRFQLREQKKAEQADLIRRFEEDRK
KVSAMREKKGKFK----------PEA--------------------------------------------
>M_thermophila_367023701 gi|367023701|ref|XP_003661135.1| hypothetical protein MYCTH_2300182 [Myceliophthora thermophila ATCC 42464]
-----------------------------------MPSGPAT-----I--GD-F-SVLPVAI--PPI---PS
-FPH---N-----VVHYLYVRRHTP----------------KIPTPT-----DDRSLFLTNVPADSTEAHLR
ALFASLV----GAGRFESA---------SFES---KRKDAH--SQTQSLIDAAQPAHAARLLQ-AH------
G--KKRKR---EDEE-AERAR------EEA-AAR-----LPST-WTRP---LRRSGNTAVVLLADEKSVEQV
LRAIAK-----T--------HKT---KKY--P-------------------------TWGADDGAGGGDVLA
---------------------G---KVP---PL-GSVW----------------LKAH-N-RLSYPDK-AAL
QASVDAFSTLFAQ-------REQEAAE------------IAK--RLRNEPD-EDGFVTV-TRG-GRAAPA--
--------SR---TEAEEAKRR----MLE--KQEKKKQEL--TN--FYRFQLRERKKEEQAELLKRFEEDRK
KLEAMRGKKAKFV----------PES--------------------------------------------
>T_terrestris_367036483 gi|367036483|ref|XP_003648622.1| hypothetical protein THITE_2106296 [Thielavia terrestris NRRL 8126]
-----------------------------------MASSPAT-----I--GD-F-SVLPVSI--PPL---PS
-FPK---N-----AVHYLYVRRHTP----------------KIPTPT-----DSRSLFVTNVPVDSTEAHLR
ALFASLV----GAGRFESA---------TFED---ESKEAHSQSQSQSLIDVAQPAHAARLLQ-AH------
G--RKRKR---EDDE-AERAR------EEA-AVR-----LPST-WTRP---LRRSGSTAVVLLADEKSVQQV
LKAIGK-----A--------HKT---KKY--P-------------------------AW-----PGSDDLPE
---------------------G---KVP---PL-GPAW----------------LKAH-N-RLSYPDR-QAL
QASVDAFSALFAR-------REQEAAE------------IAK--RLRNEPD-EDGFVTV-TRG-GRSAPA--
--------SR---TEAEEAKRR----MLE--KQEKKKEEL--TN--FYRFQLRERKKAEQAELLKRFDEDRR
KLEAMREKKGKFV----------PEA--------------------------------------------
>N_crassa_85090963 gi|85090963|ref|XP_958670.1| hypothetical protein NCU04571 [Neurospora crassa OR74A]
-----------------------------------MAPSPQT-----I--GE-F-SVLPISI--PPV---PS
-FPR---N-----VVHYLYVRRNAP----------------KIPTAN-----DSRSLFLANVPVDSTELHLR
ALFASLV----GAGRFESA---------SFED---ERKEA---EAIAAALDAA-PAQAVRLLA-AH------
G--KKRKR---EDQEAAERAE------EEA-AAR-----LPST-WTRP---LRKSGSTAVVLLADEKSVHQV
LKAIAK-----V--------HKS---KKY--P-------------------------TW-----GGEGNVVA
---------------------E---RVP---QL-GSIW----------------LKAH-N-QLSYPDR-DQL
QAAVDAFSTMFAR-------REREAAE------------IAK--RLRNEPD-EDGFVTV-TRG-GRSAPA--
--------TR---NEAEEAKKK----MIE--KAEKKKQEM--TD--FYRFQMRERKKAEQEELVKRFEEDRQ
KLDAMRQKRGKFV----------PEA--------------------------------------------
>S_macrospora_336269579 gi|336269579|ref|XP_003349550.1| hypothetical protein SMAC_03138 [Sordaria macrospora k-hell]
-----------------------------------MAPSPPT-----I--GE-F-SVLPISI--PPV---PS
-FPR---N-----VVHYLYVRRNAP----------------KIPTAN-----DSRSLFLANVPVDSTELHLR
ALFASLV----GAGRFESA---------SFEE---ERKEA---EAVAAALDAA-PAQAVRLLA-AH------
G--KKRKR---EDQEAAERAE------EEA-AAR-----LPST-WTRP---LRKSGSTAVVLLADEKSVQQV
LKAIAK-----V--------HKS---KKY--P-------------------------KW-----GGEGNVVA
---------------------E---RVP---QL-GSIW----------------LKAH-N-QLSYPDR-DQL
QAAVDAFSTMFAR-------REREAAE------------IAK--RLRNEPD-EDGFVTV-TRG-GRTAPA--
--------TR---NEAEEAKKK----MMD--KAEKKKQEM--TD--FYRFQMRERKKLEQEELVKRFEEDRV
KLDAMRQKRGKFV----------PEA--------------------------------------------
>P_anserina_171691785 gi|171691785|ref|XP_001910817.1| hypothetical protein [Podospora anserina S mat+]
-----------------------------------MPSTPPT-----L--GD-F-TVLPISI--PPL---PS
-FPK---P-----TTHYLYLRRNTP----------------KIPTPT-----DSRSLFLTNCPVDSTDIHLR
SLFASLV----GPGRFESA---------TFED---ERKDT---AHKLSPLDAAVPVNAVHLLR-AH------
GSTKKRKR---EEEEDAERSK------EDE-AAR-----LPST-WTRP---LRRSGSTAVVLLADEKSVEQV
LKACAK-----A--------SKT---KKY--P-------------------------EW--------GAGVA
---------------------D---KVP---AL-GSVW----------------VKQH-N-RLCYPDP-ATL
QQAVDAFSAVFAR-------REKEAAE------------ISK--RLRNEPD-EDGFVTV-TRG-GRNAPA--
--------SR---SEAEEARKK----MIE--RAEKKRQEM--EG--LYRFQLREKQKEEQEELLMRFEDDRK
KLEAMRMKRGKFV----------PEA--------------------------------------------
>Z_tritici_398412698 gi|398412698|ref|XP_003857667.1| hypothetical protein MYCGRDRAFT_65192 [Zymoseptoria tritici IPO323]
-----------------------------------MARSPPTRVAKTV--ND-F-SVLPIRI--PAQ---PV
-FPK---E-----ATHYLYVRANAP----------------KVPTEN-----TPREVFLVNVPIDATEKHIR
NLFAIQL----GGARVESV---------AFEG---ARVGK----------AINAPVAPV-----QQ------
G--KKRKR---GADGEDGAQL------PEE-VGA-----LPEV-WDRE---LHRSGGTAIVTFVDRVSAEMA
LKEVKR-----A--------IKN---KSV--I-------------------------VW---------TSEK
---------------------G---VAP---SL-GSAR----------------YRTH-H-TLRYPDH-AVL
QASVDNFMAAFTA-------QEEAKAK------------ALA--KLRAEPD-EDGFITV-TRG-GRVGAG--
---------R---EDEAKAKEA---------ELAKRDKNRIKED--FYRFQVREKKKEQAQDLVKGFQEDQR
RVEEMKRRRGKFR----------PE---------------------------------------------
>P_teres_330915688 gi|330915688|ref|XP_003297124.1| hypothetical protein PTT_07437 [Pyrenophora teres f. teres 0-1]
------------------------MAPSTAPKPHKAKPTPKT-----V--AD-F-TILPLTLATLPG---LP
AHCN---D-----AKHYIYVKPHSP----------------SIPTAD-----DERSLFITNVPIDATESNMR
ALFQEQL----GGSMVERV---------EFDASIPAQPMH----------KRWKSQKP-TITEDAE------
QRGKKRKRTDDAAVIAEGVVE------DAE-SA------LPQL-WNRE---VRKSGSSAVVVFVDKKSARGA
LREVQR-----A--------AKEG---KN--V-------------------------TW--------KSKGE
-------------------------------GL-GVER----------------YKTH-L-TLLHPPP-TLL
QSTLNAYLTQFNA-------LETLRNK------------LRK--TARSVPD-EDGFVAV-VRG-GRGGPA--
---------R---LEDAERKKA----ELD--ERKRNHRAT--DD--FYRFQNREKRKRAEGELKRKFEEDRR
RVEGMRGRRGVVR----------PEV--------------------------------------------
>C_gattii_321261353 gi|321261353|ref|XP_003195396.1| hypothetical protein CGB_G5540C [Cryptococcus gattii WM276]
--------------------------MPKTAAGPSTKASKPKVTQNGA--LKLYSNFLPLPILIPTPIPIPS
SSSSKSKSKSVNETKHYLYCRAHKSKASSSASASVSAFSRAKNTEGEGELLPEGRTVFVVNLPVDVTDRELR
TVFGKY-------GVVEDV---------RIGKRETGDVLEGVVRGMEAEQSDDEDEQSDDEDEDEDEDEDED
ESNDERPEATFKGDLLTKKQRRALRRRNLP-TSIPQIEPLPRLC-PRSTPYLPSGLSSAHIIFLDPISVSRL
FSSTPV-----P--------VSLPKYGKG-------------------------------------------
-------------------------------ELSGLAY----------------YDAL-Y-KSLRPSL-SAI
KSFTDTSMARFDHLHSL---LLSSRAK------------EQG---AGALVD-EDGFTVV-VRS-GKYGRA--
-GARGDGFGK---GGVGVATRGFEKKKQG--KGGKGSQAL--PD--FYKFQTLDRKRQDLAELRQKFEHDKA
RVEELKKSR-RYK----------PY---------------------------------------------
>C_neoformans_134114339 gi|134114339|ref|XP_774098.1| hypothetical protein CNBG3980 [Cryptococcus neoformans var. neoformans B-3501A]
--------------------------MPKTAAGPSTKTSKSKLSQKGV--PKLYSNFLPLPILIPAPIPIPS
SSSSKPIS----ETKHYLYCRAHKP----KASAGAGAGASASKAKETEEELPEGRTVFVVNLPVDVTDRELR
TVFGKY-------GVVEDVRIGKRETGDVLEG---VVRGMEVDQSDEESEDDEDEDEDEDEEEDEDVEIGDK
GDGDDRPEATFKGDLLTKKQRRALRRRNLP-TSIPEIDSLPALC-PRSTPYLRSGLSSAHIIFLDPISVSRL
FSSAPE-----P--------VSLPKYGKG-------------------------------------------
-------------------------------EPTGLAY----------------YTAL-Y-KSLRPPL-SAI
KSFADTSMARFDHLHSL---LLSSRAK------------EQG---AGALVD-EDGFTVV-VRS-GKYGRA--
-------GARGDGFGKGGVGVASRGFEKKKGIGGKGSQAL--PD--FYKFQALDRKRQDLAELRQKFEHDKA
RVEELKKSR-RYK----------PY---------------------------------------------
>U_maydis_71014433 gi|71014433|ref|XP_758711.1| hypothetical protein UM02564.1 [Ustilago maydis 521]
---------------MGKKSGNDGLAPSSSVSANTKHKQAQTTAIALA--NG-F-LAVPIQV---AS---RS
FANQ---T-----ILHWIYVRKHTT----------ATNSSAGSSSSNPESLPADRTLFMANLPVDTTETNLR
DMLAS-------VGAISQV---------RFRRQAGVEDGE----EDEREERGVGELSDEDDIEGEHHQLAKQ
GKKGKKKNASAGAQGKSRVPQ----IVPLP-AMH-----APST-SQDGVNGFLSTSSSAHVVFLDAASMNRA
LDRLKK----------------------G--L-------------------------KW-------RHTPET
-------------------------------LR-GLSY----------------LLSS-Y-ALSRPSL-PSV
STWANSVISLYQYRRSHPL-PRRIGVR------------GVTLGASGELLD-EDGFIIV-QRTSGKYGRA--
---GASADGG---GSVGVAKHG----FKE--NQNKKSTGL--QD--FYRFQLRERKREELAGLRKRFEEDKA
KVQKLKAGR-RFK----------PY---------------------------------------------
